# Supplementary material
Source: PubMed Central journal article supplement (PMC7489812)
Supplement: jama-e2012866-s001.pdf [file jama-e2012866-s001.pdf]

**Protocol and statistical analysis plan of a prospective randomized clinical trial of intraoperative tidal volume ventilation with 6 mL/kg per body weight and PEEP of 5 cmH<sub>2</sub>O versus 10 mL/kg per body weight and PEEP of 5 cmH<sub>2</sub>O in adult patients undergoing major surgery**

**LOW TIDAL VOLUME IN ANAESTHESIA FOR MAJOR GENERAL SURGICAL**

Dharshi Karalapillai MD FANZCA,<sup>1,2</sup> Laurence Weinberg MD FANZCA,<sup>1</sup> Phil Peyton MD FANZCA,<sup>1</sup> Louise Ellard MD FANZCA,<sup>1</sup> Raymond Hu MD FANZCA,<sup>1</sup> Brett Pearce MD FANZCA,<sup>1</sup> Chong Tan MD FANZCA,<sup>1</sup> David Story MD FANZCA,<sup>3</sup> Mark O'Donnell MD,<sup>1</sup> Patrick Hamilton MD,<sup>1</sup> Chad Oughton MD,<sup>1</sup> Jonathan Galtieri MD,<sup>1</sup> Anthony Wilson MD,<sup>1</sup> Ary Serpa Neto MD MSc PhD,<sup>2,4,5</sup> Glenn Eastwood PhD,<sup>2</sup> Rinaldo Bellomo MD PhD,<sup>2</sup> Daryl A Jones MD PhD<sup>1</sup>

**Austin Hospital, Melbourne, Victoria, Australia**

<sup>1</sup>Dept. of Anaesthesia

<sup>2</sup>Dept. of Intensive Care

**The University of Melbourne, Melbourne, Victoria, Australia**

<sup>3</sup>Dept. of Anaesthesia

**Hospital Israelita Albert Einstein, São Paulo, Brazil**

<sup>4</sup>Dept. of Critical Care Medicine

**Amsterdam University Medical Centers, Amsterdam, The Netherlands**

<sup>5</sup>Dept. of Intensive Care

Word count (Abstract): 242 words

Word count (Text): 2795 words

Inserts: 4 tables and 1 figure

Online supplement: 1 supplement

**Corresponding author**

Dharshi Karalapillai, MD

Dept. of Intensive Care

Austin Hospital

Studley Rd, Heidelberg, Melbourne, Victoria, Australia, 3084

+613 9496 5000

dharshi.karalapillai@austin.org.au

## **SUMMARY**

**INTRODUCTION:** Mechanical ventilation is mandatory in patients undergoing general anaesthesia for major surgery. Tidal volumes higher than 10 mL/kg of predicted body weight (PBW) have been advocated for intraoperative ventilation, however, recent evidence suggests that low tidal volumes may benefit surgical patients. To date, the impact of low tidal volume compared to conventional tidal volume during surgery has only been assessed in clinical trials also combining different levels of positive-end expiratory pressure (PEEP) in each arm.

**AIM:** To assess the impact of low tidal volume compared to conventional tidal volume during general anaesthesia for surgery on the incidence of postoperative respiratory complications in adult patients receiving moderate levels of PEEP.

**METHODS:** Single center, two-arm, randomized clinical trial. In total, 1240 adult patients older than 40 years scheduled for at least 2 hours of surgery under general anaesthesia and routinely monitored with an arterial line will be included. Patients will be ventilated intraoperatively with moderate level of PEEP (5 cmH<sub>2</sub>O) and randomly assigned to tidal volume of 6 mL/kg PBW (low tidal volume) or tidal volume of 10 mL/kg PBW (conventional tidal volume in Australia). The primary outcome will be the occurrence of postoperative respiratory complications, recorded as a composite endpoint of adverse respiratory events within the first seven postoperative days.

**CONCLUSION:** This is the first well-powered study comparing the effect of low and high tidal volume ventilation during surgery on the incidence of postoperative respiratory complications in adult patients receiving moderate levels of PEEP.

**FUNDING:** Funded by the Australia and New Zealand College of Anaesthetists (ANZAC16/008).

**REGISTRATION:** ANZCTR identifier: ACTRN12614000790640. Registered on July 24, 2014.

**KEYWORDS:** Mechanical ventilation; tidal volume; PEEP; surgery; respiratory complications

## INTRODUCTION

Mechanical ventilation is a mandatory intervention in patients undergoing general anaesthesia for major surgery. However, it has many potentially detrimental effects, the most dangerous being ventilator induced lung injury (VILI).<sup>1</sup> VILI can result from cyclic overstretching of aerated alveoli induced by the use of high tidal volume (*volutrauma*), from repeated opening and closing of peripheral airways induced by the use of insufficient levels of positive-end expiratory pressure (PEEP) (*barotrauma*), and from the direct use of high airway pressures (*barotrauma*).<sup>1,2</sup>

For several years, a high tidal volume strategy using tidal volumes higher than 10 mL/kg of predicted body weight (PBW) has been advocated for intraoperative ventilation.<sup>3</sup> The potential advantages of this strategy include reduced incidence of atelectasis, due to the maintenance of a high pressure in the airways, and a consequent reduction in the risk of perioperative hypoxaemia.<sup>3</sup> However, the potential benefits of a low tidal volume strategy first became apparent in studies in critically ill patients with acute respiratory distress syndrome (ARDS), where the use of low tidal volume is strongly associated with better clinical outcomes.<sup>4</sup> In addition, recent studies suggest that the use of high tidal volumes can initiate lung injury even in healthy lungs, especially during major surgery with its associated inflammatory response, making the lungs more prone to VILI.<sup>5</sup>

A recent multicentre clinical trial in France showed that, in a high-risk population, a bundle of care composed of low tidal volume, moderate levels of PEEP, and recruitment manoeuvres reduced the incidence of major complications in patients undergoing abdominal surgery compared to the use of

high tidal volume and no PEEP.<sup>6</sup> Nevertheless, this study compared a bundle of interventions and it is impossible to isolate which component was beneficial. A recent multicentre clinical trial sought to address this issue and compared the effect of a low PEEP strategy (< 2 cmH<sub>2</sub>O) with a high PEEP strategy (12 cmH<sub>2</sub>O) in patients undergoing major abdominal surgery and receiving low tidal volume ventilation.<sup>7</sup> In this study, the use of high levels of PEEP was not associated with better outcomes, suggesting that tidal volume may be more important in the prevention of complications.<sup>7</sup> Indeed, an individual patient meta-analysis including data from 21 studies supported this notion.<sup>8</sup>

Our group recently reported that, in Australia, the use of high tidal volume (around 10 ml/kg PBW) is relatively common and that the average tidal volume during major abdominal surgery is approximately 10 ml/kg of PBW and that the standard level of PEEP used in the intraoperative period is 5 cmH<sub>2</sub>O.<sup>9</sup> These findings suggest that in this setting a high tidal volume strategy in combination with moderate levels of PEEP is likely the most common strategy for intraoperative ventilation in Australia. The findings of our study imply that the control groups of previous randomized controlled trials of a low tidal volume strategy for intraoperative ventilation do not reflect the practice of intraoperative mechanical ventilation in Australia. To date, no suitably powered randomized clinical trial has assessed the isolated impact of tidal volume in surgical patients in the setting of a fixed moderate levels of PEEP.

The present study outlines the protocol and statistical analysis plan for a prospective randomized controlled trial comparing the effect of low tidal volume ventilation, using 6 ml/kg PBW, with conventional ventilation using 10 ml/kg PBW (as currently practiced in Australia) on the incidence of postoperative respiratory

complications in adult patients undergoing major surgery and receiving 5 cmH<sub>2</sub>O of PEEP. Recruitment for the trial has now been completed but no data analysis has yet been undertaken. This trial is registered with ANZCTR (ACTRN12614000790640).

## **METHODS**

### *Study design*

Single centre, randomized superiority trial of low tidal volume ventilation compared to conventional ventilation in a tertiary teaching hospital affiliated to the University of Melbourne. The protocol was approved by the Austin Health Human Research Ethics Committee (HREC), and informed consent will be collected by local investigators for all patients before inclusion in the trial. No interim analyses is planned.

### *Study population*

#### Inclusion criteria

Patients must satisfy all of the following inclusion criteria:

- Age  $\geq$  40 years; and
- Expected duration of ventilation for surgery  $\geq$  2 hours; and
- Need of an arterial line for routine monitoring during the surgery.

#### Exclusion criteria

Patients will be excluded from the study if any of the criteria listed below apply:

- Pregnancy or lactation; or
- Thoracic surgery; or
- Cardiac surgery; or
- Intracranial neurosurgery; or
- Need of nitrous oxide administration; or
- Previous enrolment in the trial.

#### Rationale for the inclusion and exclusion criteria

Older patients and longer expected duration of surgery are well known major risk factors for the development of postoperative respiratory complications,<sup>11</sup> thus, we

aimed to enrol an 'enriched' population where the rate of the primary outcome would be expected to be higher. In addition, the use of an arterial line during surgery also denotes a higher risk procedure, and permits sampling of arterial blood gases for evaluation of PaO<sub>2</sub>.<sup>9</sup> The exclusion criteria are related to situations where: 1) ventilation practice differs markedly (one-lung ventilation in thoracic surgery and no ventilation during cardiopulmonary bypass in cardiac surgery); 2) the use of low tidal volume and consequent hypercapnia can induce harm (intracranial surgery); and 3) the outcome and management is expected to be different from usual (pregnancy and use of nitrous oxide).

#### *Randomization and masking*

A randomization list will be computer-generated by an independent investigator. Randomization will be conducted using sealed, sequentially numbered and opaque envelopes placed in the operating room and without any stratification factor. Patients who satisfy all inclusion criteria and have no exclusion criteria will be randomly assigned in a 1:1 ratio to either low tidal volume ventilation or conventional ventilation, using a permuted block method with random block sizes of 4, 6 or 10. Due to the nature of the intervention, blinding is not possible.

#### *Intervention*

General management such as the inspired fraction of oxygen (FiO<sub>2</sub>), respiratory rate, general anaesthesia technique, fluid management, use of vasoactive drugs, analgesia plan, use of prophylactic antibiotics and anti-emetics agents will be at the discretion of the treating anaesthesiologist and in accordance with existing protocols for patients undergoing major surgery and equal for both groups. PBW will be calculated as  $50 + 0.91 * (\text{height [cm]} - 152.4)$  for males and  $45.5 +$



$0.91 * (\text{height [cm]} - 152.4)$  for females. Patients will be randomized to one of the following interventions:

#### Low tidal volume ventilation

Immediately after randomization, patients assigned to the low tidal volume group will be ventilated with volume-controlled ventilation, a tidal volume of 6 mL/kg PBW and PEEP of 5 cmH<sub>2</sub>O. This allocated tidal volume target and PEEP will be maintained for the whole duration of the surgical procedure.

#### Conventional ventilation

Immediately after randomization, patients assigned to the conventional ventilation group will be ventilated with volume-controlled ventilation, a tidal volume of 10 mL/kg PBW and a PEEP of 5 cmH<sub>2</sub>O. This allocated tidal volume target and PEEP will be maintained for the whole duration of the surgical procedure.

#### *Data collection*

A purposed built and design case report form (CRF) will be used for data collection. All data will be collected by trained research staff at study site directly from the clinical chart source data. Information recorded in the CRF will be required to accurately reflect the participant's medical and hospital notes. The study timelines, procedures and assessments are shown in **Table 1**. After the data collection is completed the database will be locked and only the principal investigator and the statistician responsible for the analyses will have access to it.

#### *Study outcomes*

#### Primary outcome

The primary outcome is the incidence of a composite outcome of postoperative respiratory complications, defined as positive if any component developed within the first 7 days after surgery. The following complications will be considered:

- Pneumonia (defined as need of antibiotics for a suspected respiratory infection and one or more of the following criteria: new or changed sputum, new or changed lung opacities, fever and/or white blood cell count  $> 12 \times 10^9/L$ );
- Bronchospasm (defined as newly detected expiratory wheeze treated with bronchodilators);
- Atelectasis (defined as lung opacification with a shift of the mediastinum, hilum or hemidiaphragm toward the affected area, and compensatory over-inflation in the adjacent non-atelectatic lung);
- Pulmonary congestion (defined as clinical signs of congestion, including dyspnoea, oedema, rales, and jugular venous distention, with or without chest x-ray demonstrating increase in vascular markings and diffuse alveolar interstitial infiltrates);
- Respiratory failure (defined as a postoperative  $PaO_2 < 60$  mmHg on room air, a  $PaO_2 / FiO_2$  ratio  $< 300$  mmHg or arterial oxyhaemoglobin saturation measured with pulse oximetry  $< 90\%$  and requiring oxygen therapy);
- Pleural effusion (defined as chest radiograph demonstrating blunting of the costophrenic angle, loss of sharp silhouette of the ipsilateral hemidiaphragm in upright position, evidence of displacement of adjacent anatomical structures or [in supine position] a hazy opacity in one hemithorax with preserved vascular shadows);

- Pneumothorax (defined as air in the pleural space with no vascular bed surrounding the visceral pleura);
- Requirement for mechanical ventilation (defined as unplanned need of non-invasive or invasive ventilation).

All components of the primary outcome comprehending the assessment of chest X-rays or computed tomography will be adjudicated by assessors blinded to the treatment allocation.

#### Secondary outcomes

Secondary outcomes will include (according to the definition in **Table S1** in **Online Supplement**):

- Incidence of postoperative respiratory complications during hospital stay;
- Incidence of pulmonary embolism;
- Incidence of acute respiratory distress syndrome;
- Incidence of systemic inflammatory response syndrome;
- Incidence of sepsis;
- Incidence of acute kidney injury;
- Incidence of wound infection (superficial and deep);
- Rate of intraoperative need of vasopressor;
- Incidence of unplanned intensive care unit (ICU) admission;
- Rate of need for medical emergency team call;
- ICU length of stay;
- Hospital length of stay;
- Incidence of in-hospital mortality.

#### *Sample size calculation*

The sample size for this study has been calculated based on the incidence of postoperative respiratory complications of 10.8% observed in a previously study by our group.<sup>10</sup> A study population of 1240 patients will provide 80% power at a two-sided significance level of 0.05 to detect an absolute reduction in primary outcome of 3.4% allowing a dropout rate of 3%.

### *Statistical analyses*

All statistical analyses will be conducted on an intention-to-treat basis, with patients analysed according to their assigned treatment arms, unless otherwise indicated (**Figure 1**). No or minimal losses to follow-up for the primary and secondary outcomes are anticipated. Complete-case analysis will be carried out for all the outcomes. However, if more than 5% of missing data were found for the primary outcome, a sensitivity analysis using multiple imputations and estimating-equation methods will be carried out.

Hypothesis tests will be two-sided with a significance level of 0.05. In addition to the unadjusted  $p$ -values for secondary outcomes, a Holm-Bonferroni procedure will be applied to control for multiple testing [12]. Analyses will be performed using the R (R Core Team, 2016, Vienna, Austria) program.

### Baseline characteristics

A description of the baseline characteristics of the trial participants will be presented by treatment group (**Table 2**). Discrete variables will be summarized as numbers (%). Percentages will be calculated according to the number of trial participants for whom data are available. Where values are missing, the denominator will be stated in the table and no assumptions or imputations will be made. Continuous variables will be summarized by either means and standard

deviations (SD) or medians and interquartile ranges (IQR), according to the observed distribution of the variable.

#### Intraoperative characteristics

Intraoperative characteristics including ventilation practice will be reported according to the **Table 3**, and **Table S2, S3** and **S4** in **Online Supplement**. Absolute differences between the groups with the respective 95% confidence interval will be calculated as mean differences from an independent *t*-test for continuous variables and risk differences derived from a generalized linear model considering a binomial distribution with an identity-link.

#### Proposed additional figures

Figure 2 – Incidence of Composite of Respiratory Complications According to Pre-specified Subgroups

Figure S1 – Forest Plot Showing the Results of the Sensitivity Analysis for the Primary Outcome Individual component analysis, count analysis, common effect test and average relative effect test.

#### Primary outcome

The effects of the intervention on incidence of postoperative respiratory complications will be reported as number and percentages and estimated with risk ratio and 95% confidence intervals calculated with Wald's likelihood ratio approximation test and with  $\chi^2$  tests for hypothesis testing (**Table 4**). In addition, a generalized linear model with binomial distribution and with an identity-link function will be used to derive risk difference with 95% confidence interval.

#### Secondary outcomes

The effects of the intervention on binary secondary outcomes will be reported as number and percentages and estimated with risk ratio and 95% confidence

intervals calculated with Wald's likelihood ratio approximation test and with  $\chi^2$  tests for hypothesis testing (**Table 4**). In addition, a generalized linear model with binomial distribution and with an identity–link function will be used to derive risk difference with 95% confidence interval. The effects of the intervention on length of ICU and hospital stay will be estimated with generalized linear models considering distributions that will fit a possible heavy right–tailed distribution without zero (such as truncated Poisson, gamma distribution or inverse Gaussian), choosing the best fit according to model's deviance. In addition, a Holm–Bonferroni correction to control the family–wide error rate to the  $p$ –values for all 13 secondary outcomes will be done and presented in a Table.

#### Subgroup analyses

The effects of the intervention on pre-specified subgroups will be assessed using generalized linear models considering a binomial distribution with an interaction between each subgroup and the study arm as fixed-effect. All such subgroup analyses will be exploratory, and the potentially reduced power of such tests to find evidence of significant interactions is acknowledged. These results will be reported as a forest plot. The specific subgroups that will be considered are:

- Abdominal vs. Non-abdominal surgery;
- Open vs. Laparoscopic surgery;
- Body mass index  $> 35 \text{ kg/m}^2$  vs. Body mass index  $\leq 35 \text{ kg/m}^2$ ;
- Higher vs. Lower risk for respiratory complications.

#### Sensitivity analyses

As a sensitivity analysis, the effect of the intervention on primary outcome will be re-estimated using a generalized linear model with binomial distribution with additional adjustment for age, gender, baseline SpO<sub>2</sub>, body mass index and

ARISCAT score, plus any variables with substantial imbalance across treatment arms at baseline.

Since the primary outcome of the present study is a composite one, the choice of the statistical method is an important part of design because various methods provide different power, depending on the situation. In addition to the standard analysis described above, the following analyses will be performed to test the robustness of the trial findings:

- Count analysis: the number of positive component events (i.e., 'count') across the composite will be assessed. The groups will be compared on the count using a Wilcoxon rank–sum test, and the odds ratio with the 95% confidence interval will be assessed with a proportional odds logistic regression model;
- Individual component analysis: the effect of the intervention in each component will be analysed using a generalized linear model using a Bonferroni correction for multiple comparisons. The 99.37% Bonferroni–corrected confidence intervals will be reported ( $1 - 0.05/8 = 0.9937$ );
- Common effect test: A multivariate (i.e., multiple outcomes per subject) generalized estimating equations (GEE) model will be used to estimate a common effect odds ratio across the components;
- Average relative effect test: The average relative effect test will be assessed by averaging the component-specific treatment effect from the distinct effects model, and testing whether the average is equal to zero. In the GEE distinct effect model a distinct treatment effect is estimated for each component;

- Heterogeneity of treatment effect: Heterogeneity of treatment effect across components will be assessed by a treatment-by-component interaction test in the distinct effects GEE model.

#### *Consenting and ethical compliance*

All patients will give their consent before their inclusion in the study. Two situations may result in cessation of trial treatment:

- Patient or legal surrogate may decline consent to continue trial treatments;  
or
- Patient or legal surrogate may withdraw consent to continue in the trial.

In both cases, trial specific treatments will be interrupted and the patient will continue therapy as prescribed by the treating anaesthesiologist. When this situation occurs, consent for data collection will be sought, and if this is declined, the patient's data will be removed from the website and not analysed, apart from data related to randomisation and consent.

#### *Data safety monitoring board*

No monitoring by an independent monitoring board will be done.



## **CONCLUSION**

The present study is a single centre Australian and New Zealand College of Anaesthetists funded randomised clinical trial designed to recruit a total of 1240 patients comparing a low tidal volume ventilation with 6 mL/kg of PBW with a conventional ventilation with 10 mL/kg PBW in adult patients undergoing general anaesthesia for major surgery who are expected to last at least 2 hours and receiving a PEEP of 5 cmH<sub>2</sub>O.

**LEGEND TO FIGURES****Figure 1 – Flowchart of inclusion**

ITT: intention to treat

**Table 1 – SPIRIT diagram, study timelines and procedures**

|                                     | Pre randomization |               | Perioperative  |      | Post randomization |         |                    |
|-------------------------------------|-------------------|---------------|----------------|------|--------------------|---------|--------------------|
|                                     | Preoperative      | Randomization | Intraoperative | PACU | Once daily         | 07 days | Hospital discharge |
| <b>Enrolment</b>                    |                   |               |                |      |                    |         |                    |
| Eligibility screening               | ■                 |               |                |      |                    |         |                    |
| Allocation                          |                   | ■             |                |      |                    |         |                    |
| Baseline data                       | ■                 |               |                |      |                    |         |                    |
| Informed consent                    | ■                 |               |                |      |                    |         |                    |
| <b>Interventions</b>                |                   |               |                |      |                    |         |                    |
| Low tidal volume                    |                   |               | ■              |      |                    |         |                    |
| Conventional tidal volume           |                   |               |                | ■    |                    |         |                    |
| <b>Measurements</b>                 |                   |               |                |      |                    |         |                    |
| Ventilatory variables               |                   |               | ■              |      |                    |         |                    |
| Arterial blood gases                |                   |               | ■              | ■    |                    |         |                    |
| Vital signs                         |                   |               | ■              |      |                    |         |                    |
| Anaesthesia characteristics         |                   |               | ■              |      |                    |         |                    |
| <b>Outcomes</b>                     |                   |               |                |      |                    |         |                    |
| Respiratory complications           |                   |               |                |      | ■                  | ■       | ■                  |
| Pulmonary embolism                  |                   |               |                |      | ■                  | ■       | ■                  |
| Acute respiratory distress syndrome |                   |               |                |      | ■                  | ■       | ■                  |
| SIRS                                |                   |               |                |      | ■                  | ■       | ■                  |
| Sepsis                              |                   |               |                |      | ■                  | ■       | ■                  |
| Acute kidney injury                 |                   |               |                |      | ■                  | ■       | ■                  |
| Wound infection                     |                   |               |                |      | ■                  | ■       | ■                  |
| Intraoperative need of vasopressor  |                   |               | ■              |      |                    |         |                    |
| Unplanned ICU admission             |                   |               |                |      | ■                  | ■       | ■                  |
| Need for MET call                   |                   |               |                |      | ■                  | ■       | ■                  |
| ICU length of stay                  |                   |               |                |      |                    |         | ■                  |
| Hospital length of stay             |                   |               |                |      |                    |         | ■                  |
| In-hospital mortality               |                   |               |                |      |                    |         | ■                  |

PACU: post-anaesthesia care unit; SIRS: systemic inflammatory response syndrome; ICU: intensive care unit; MET: Medical Emergency Team

**Table 2 – Baseline characteristics of the included patients**

|                                        | Low Tidal Volume<br>Ventilation<br>(n = ) | Conventional<br>Ventilation<br>(n = ) |
|----------------------------------------|-------------------------------------------|---------------------------------------|
| Age, years                             |                                           |                                       |
| Male gender                            |                                           |                                       |
| Body weight, kg                        |                                           |                                       |
| Actual                                 |                                           |                                       |
| Predicted                              |                                           |                                       |
| Body mass index, kg/m <sup>2</sup>     |                                           |                                       |
| ARISCAT risk score                     |                                           |                                       |
| Low                                    |                                           |                                       |
| Moderate                               |                                           |                                       |
| High                                   |                                           |                                       |
| Preoperative SpO <sub>2</sub> , %      |                                           |                                       |
| Preoperative HCO <sub>3</sub> , mmol/L |                                           |                                       |
| Preoperative hemoglobin, g/dL          |                                           |                                       |
| Preoperative creatinine, µmol/L        |                                           |                                       |
| Co-morbidities                         |                                           |                                       |
| Diabetes mellitus                      |                                           |                                       |
| Hypertension                           |                                           |                                       |
| Coronary artery disease                |                                           |                                       |
| Chronic renal disease                  |                                           |                                       |
| Chronic liver disease                  |                                           |                                       |
| Current smoker                         |                                           |                                       |
| COPD                                   |                                           |                                       |
| Asthma                                 |                                           |                                       |
| Interstitial lung disease              |                                           |                                       |
| Bronchiectasis                         |                                           |                                       |
| Obstructive sleep apnea                |                                           |                                       |
| Obesity*                               |                                           |                                       |
| Recent LRTI                            |                                           |                                       |
| Type of surgery                        |                                           |                                       |
| General                                |                                           |                                       |
| Abdominal                              |                                           |                                       |
| Open                                   |                                           |                                       |
| Laparoscopic                           |                                           |                                       |
| Orthopaedics                           |                                           |                                       |
| Peripheral                             |                                           |                                       |
| Spine                                  |                                           |                                       |
| ENT / Plastic / Maxillofacial          |                                           |                                       |
| Other                                  |                                           |                                       |

Data are presented as mean ± standard deviation or N (%)

ARISCAT: Assess Respiratory Risk in Surgical Patients in Catalonia; COPD: chronic obstructive pulmonary disease; ENT: ear, nose and throat surgery; HCO<sub>3</sub>: bicarbonate; LRTI: lower respiratory tract infection; SpO<sub>2</sub>: pulse oximetry; TAP: transversus abdominis plane

\* defined as BMI > 30 kg/m<sup>2</sup>

**Table 3 – Intraoperative characteristics, ventilation and oxygenation**

|                                     | Low Tidal Volume<br>Ventilation<br>(n = ) | Conventional<br>Ventilation<br>(n = ) | Absolute Difference<br>(95% CI) | p value |
|-------------------------------------|-------------------------------------------|---------------------------------------|---------------------------------|---------|
| Tidal volume                        |                                           |                                       |                                 |         |
| Absolute, mL                        |                                           |                                       |                                 |         |
| Adjusted, mL/kg PBW <sup>a</sup>    |                                           |                                       |                                 |         |
| PEEP, cmH <sub>2</sub> O            |                                           |                                       |                                 |         |
| Peak pressure, cmH <sub>2</sub> O   |                                           |                                       |                                 |         |
| Highest                             |                                           |                                       |                                 |         |
| Respiratory rate, bpm               |                                           |                                       |                                 |         |
| Lowest                              |                                           |                                       |                                 |         |
| Highest                             |                                           |                                       |                                 |         |
| SpO <sub>2</sub> , %                |                                           |                                       |                                 |         |
| Lowest                              |                                           |                                       |                                 |         |
| Highest                             |                                           |                                       |                                 |         |
| FiO <sub>2</sub> , %                |                                           |                                       |                                 |         |
| Highest                             |                                           |                                       |                                 |         |
| etCO <sub>2</sub> , mmHg            |                                           |                                       |                                 |         |
| Highest                             |                                           |                                       |                                 |         |
| ABG analysis after induction        |                                           |                                       |                                 |         |
| pH                                  |                                           |                                       |                                 |         |
| PaO <sub>2</sub> , mmHg             |                                           |                                       |                                 |         |
| PaCO <sub>2</sub> , mmHg            |                                           |                                       |                                 |         |
| HCO <sub>3</sub> , mmol/L           |                                           |                                       |                                 |         |
| PaO <sub>2</sub> / FiO <sub>2</sub> |                                           |                                       |                                 |         |
| Base excess                         |                                           |                                       |                                 |         |
| Lactate, mmol/L                     |                                           |                                       |                                 |         |
| Hypoxemia <sup>*</sup>              |                                           |                                       |                                 |         |
| Acidosis <sup>**</sup>              |                                           |                                       |                                 |         |
| Hypercapnia <sup>***</sup>          |                                           |                                       |                                 |         |
| ABG analysis prior closure          |                                           |                                       |                                 |         |
| pH                                  |                                           |                                       |                                 |         |
| PaO <sub>2</sub> , mmHg             |                                           |                                       |                                 |         |
| PaCO <sub>2</sub> , mmHg            |                                           |                                       |                                 |         |
| HCO <sub>3</sub> , mmol/L           |                                           |                                       |                                 |         |

PaO<sub>2</sub> / FiO<sub>2</sub>  
 Base excess  
 Lactate, mmol/L  
 Hypoxemia\*  
 Acidosis\*\*  
 Hypercapnia\*\*\*  
 Duration of surgery, minutes  
 Use of regional anaesthesia  
   Spinal local anaesthesia  
   Spinal opioid  
   Epidural  
   Paravertebral block  
   TAP / Abdominal block  
   Peripheral limb block

---

Data are presented as mean ± standard deviation or N (%)

*ABG: arterial blood gas; CI: confidence interval; etCO<sub>2</sub>: end-tidal carbon dioxide; FiO<sub>2</sub>: inspired fraction of oxygen; HCO<sub>3</sub>: bicarbonate; PaO<sub>2</sub>: partial pressure of oxygen.*

*PaCO<sub>2</sub>: partial pressure of carbon dioxide; PBW: predicted body weight; PEEP: positive end-expiratory pressure; SpO<sub>2</sub>: pulse oximetry*

*a PBW was calculated as 50 + 0.91 x (height [cm] – 152.4) for men and 45.5 + 0.91 x (height [cm] – 152.4) for women.*

\* defined as PaO<sub>2</sub> < 60 mmHg

\*\* defined as pH < 7.30

\*\*\* defined as PaCO<sub>2</sub> > 60 mmHg

**Table 4 – Primary and secondary outcomes**

|                                                          | Low Tidal Volume<br>Ventilation<br>(n = ) | Conventional<br>Ventilation<br>(n = ) | Effect Estimate<br>(95% CI) | Absolute Difference<br>(95% CI) | p<br>value |
|----------------------------------------------------------|-------------------------------------------|---------------------------------------|-----------------------------|---------------------------------|------------|
| <b>Primary outcome</b>                                   |                                           |                                       |                             |                                 |            |
| Composite respiratory complications within seven days    |                                           |                                       | RR                          | RD                              |            |
| <b>Components of the primary outcome</b>                 |                                           |                                       |                             |                                 |            |
| Pneumonia                                                |                                           |                                       | RR                          | RD                              |            |
| Respiratory failure                                      |                                           |                                       | RR                          | RD                              |            |
| Pleural effusion                                         |                                           |                                       | RR                          | RD                              |            |
| Atelectasis                                              |                                           |                                       | RR                          | RD                              |            |
| Pneumothorax                                             |                                           |                                       | RR                          | RD                              |            |
| Bronchospasm                                             |                                           |                                       | RR                          | RD                              |            |
| Pulmonary congestion                                     |                                           |                                       | RR                          | RD                              |            |
| Unplanned non-invasive or invasive ventilation           |                                           |                                       | RR                          | RD                              |            |
| <b>Secondary outcomes</b>                                |                                           |                                       |                             |                                 |            |
| Composite respiratory complications during hospital stay |                                           |                                       | RR                          | RD                              |            |
| Pulmonary embolism                                       |                                           |                                       | RR                          | RD                              |            |
| Acute respiratory distress syndrome                      |                                           |                                       |                             |                                 |            |
| SIRS                                                     |                                           |                                       | RR                          | RD                              |            |
| Sepsis                                                   |                                           |                                       | RR                          | RD                              |            |
| Acute kidney injury                                      |                                           |                                       | RR                          | RD                              |            |
| Wound infection                                          |                                           |                                       | RR                          | RD                              |            |
| Superficial                                              |                                           |                                       | RR                          | RD                              |            |
| Deep                                                     |                                           |                                       | RR                          | RD                              |            |
| Intraoperative need of vasopressor                       |                                           |                                       | RR                          | RD                              |            |
| Unplanned ICU admission                                  |                                           |                                       | RR                          | RD                              |            |
| Need for MET call                                        |                                           |                                       | RR                          | RD                              |            |
| Length of stay                                           |                                           |                                       |                             |                                 |            |
| In ICU, days                                             |                                           |                                       | MD                          | MD                              |            |
| In hospital, days                                        |                                           |                                       | MD                          | MD                              |            |
| In-hospital mortality                                    |                                           |                                       | RR                          | RD                              |            |

Data are presented as mean ± standard deviation or N (%)

CI: confidence interval; HR: hazard ratio; ICU: intensive care unit; MD: mean difference; MET: medical emergency team; RR: risk ratio; PACU: post-anesthesia care unit; RD: risk difference

**CONFLICT OF INTEREST**

The authors declare no conflict of interest.



## REFERENCES

1. Slutsky AS, Ranieri VM. Ventilator-induced lung injury. *N Engl J Med* 2013; 369:2126-36.
2. Ricard JD, Dreyfuss D, Saumon G. Ventilator-induced lung injury. *Eur Respir J Suppl* 2003; 42:2s-9s.
3. Bendixen HH, Hedley-Whyte J, Laver MB. Impaired oxygenation in surgical patients during general anesthesia with controlled ventilation. A concept of atelectasis. *N Engl J Med* 1963; 269:991-6.
4. Acute Respiratory Distress Syndrome Network, Brower RG, Matthay MA, et al. Ventilation with lower tidal volumes as compared with traditional tidal volumes for acute lung injury and the acute respiratory distress syndrome. *N Engl J Med* 2000; 342:1301-8.
5. Wolthuis EK, Vlaar AP, Choi G, Roelofs JJ, Juffermans NP, Schultz MJ. Mechanical ventilation using non-injurious ventilation settings causes lung injury in the absence of pre-existing lung injury in healthy mice. *Crit Care* 2009; 13:R1.
6. Futier E, Constantin JM, Paugam-Burtz C, et al. A trial of intraoperative low-tidal-volume ventilation in abdominal surgery. *N Engl J Med* 2013; 369:428-37.
7. PROVE Network Investigators for the Clinical Trial Network of the European Society of Anaesthesiology, Hemmes SN, Gama de Abreu M, et al. High versus low positive end-expiratory pressure during general anaesthesia for open abdominal surgery (PROVHILO trial): a multicentre randomised controlled trial. *Lancet* 2014; 384:495-503.

8. Serpa Neto A, Hemmes SN, Barbas CS, et al. Protective versus Conventional Ventilation for Surgery: A Systematic Review and Individual Patient Data Meta-analysis. *Anesthesiology* 2015; 123:66-78.
9. Karalapillai D, Weinberg L, Galtieri J, et al. Current ventilation practice during general anaesthesia: a prospective audit in Melbourne, Australia. *BMC Anesthesiol* 2014; 14:85.
10. Bellomo R, Weinberg L, Armellini A. Fluid Intervention and Renal outcome trial in patients undergoing major surgery (FLURO Study) Australian New Zealand Clinical Trials Registry no: 12614000666628; Submitted for publication 2015.
11. Canet J, Gallart L, Gomar C, et al. Prediction of postoperative pulmonary complications in a population-based surgical cohort. *Anesthesiology* 2010; 113:1338-50.
12. Holm S. A simple sequentially rejective multiple test procedure. *Scand J Stat* 1979; 6:65-70.
