# Supplementary material
Source: PubMed Central journal article supplement (PMC7489812)
Supplement: jama-e2012866-s002.pdf [file jama-e2012866-s002.pdf]

## Supplementary Online Content

Karalapillai D, Weinberg L, Peyton P, et al. Effect of intraoperative low tidal volume vs conventional tidal volume on postoperative pulmonary complications in patients undergoing major surgery: a randomized clinical trial. *JAMA*. Published September 1, 2020. doi:10.1001/jama.2020.12866

### **eAppendix.** Supplemental Methods

**eTable 1.** Definition of the Primary Outcome

**eTable 2.** Definitions of the Secondary Outcomes

**eTable 3.** Missing Values for Study Variables

**eTable 4.** Detailed Description of Surgical Procedures

**eTable 5.** Additional Intraoperative Data

**eTable 6.** Postoperative Characteristics

**eTable 7.** Protocol Violations and Reason for Violations

**eTable 8.** Adjusted *P* Values for the Secondary Outcomes

**eTable 9.** Additional Sensitivity Analyses for the Primary Outcome

**eTable 10.** Primary and Secondary Outcomes Only in Patients Undergoing Laparoscopic Surgery

**eFigure 1.** Trend Over Time for Arterial Blood Gases

**eFigure 2.** Kaplan-Meier Estimates for Patients in the Low Tidal Volume and Conventional Tidal Volume Groups

**eFigure 3.** Results of the Sensitivity Analyses for the Primary Outcome

**eFigure 4.** Risk Ratio for Postoperative Respiratory Complications in Post Hoc Subgroups

**eFigure 5.** Results of the Sensitivity Analysis Allocating 22 Additional Patients in the Conventional Arm With Different Incidences of the Primary Outcomes

This supplementary material has been provided by the authors to give readers additional information about their work.

## **eAppendix.** Supplemental Methods

### *Rationale for the inclusion and exclusion criteria*

Older patients and longer expected duration of surgery are well known major risk factors for the development of postoperative respiratory complications, thus, we aimed to enroll an ‘enriched’ population where the rate of the primary outcome would be expected to be higher. ‘Major surgery’ was defined as an expected duration of surgery greater than 2 hours and an expected hospital stay of at least one night. In addition, the use of an arterial line during surgery also denotes a higher risk procedure, and permits sampling of arterial blood gases for evaluation of PaO<sub>2</sub>. The exclusion criteria are related to situations where: 1) ventilation practice differs markedly (one-lung ventilation in thoracic surgery and no ventilation during cardiopulmonary bypass in cardiac surgery); 2) the use of low tidal volume and consequent hypercapnia can induce harm (intracranial surgery); and 3) the outcome and management is expected to be different from usual (pregnancy and use of nitrous oxide).

### *Sensitivity analyses*

Since the primary outcome of the present study is a composite one, the choice of the statistical method is an important part of design because various methods provide different power, depending on the situation. In addition to the standard analysis described, the following pre-specified analyses were performed to test the robustness of the trial findings:

- Count analysis: the number of positive component events (i.e., ‘count’) across the composite was assessed. The groups were compared on the count using a Wilcoxon rank–sum test, and the odds ratio with the 95%

confidence interval was assessed with a proportional odds logistic regression model;

- Individual component analysis: the effect of the intervention in each component was analysed using a generalized linear model using a Bonferroni correction for multiple comparisons. The 99.37% Bonferroni-corrected confidence intervals are reported ( $1 - 0.05/8 = 0.9937$ );
- Common effect test: A multivariate (i.e., multiple outcomes per subject) generalized estimating equations (GEE) model was used to estimate a common effect odds ratio across the components;
- Average relative effect test: The average relative effect test was assessed by averaging the component-specific treatment effect from the distinct effects model, and testing whether the average is equal to zero. In the GEE distinct effect model a distinct treatment effect is estimated for each component;
- Heterogeneity of treatment effect: Heterogeneity of treatment effect across components was assessed by a treatment-by-component interaction test in the distinct effects GEE model.

**eTable 1. Definition of the Primary Outcome**

|                                        | <b>Definition</b>                                                                                                                                                                                                                                                                                                |
|----------------------------------------|------------------------------------------------------------------------------------------------------------------------------------------------------------------------------------------------------------------------------------------------------------------------------------------------------------------|
| Pneumonia                              | Defined as need of antibiotics for a suspected respiratory infection and one or more of the following criteria: new or changed sputum, new or changed lung opacities, fever and/or white blood cell count $> 12 \times 10^9/L$                                                                                   |
| Bronchospasm                           | Defined as newly detected expiratory wheeze treated with bronchodilators                                                                                                                                                                                                                                         |
| Atelectasis                            | Defined as lung opacification with a shift of the mediastinum, hilum or hemidiaphragm toward the affected area, and compensatory over-inflation in the adjacent non-atelectatic lung                                                                                                                             |
| Pulmonary congestion                   | Defined as clinical signs of congestion, including dyspnoea, oedema, rales, and jugular venous distention, with or without chest x-ray demonstrating increase in vascular markings and diffuse alveolar interstitial infiltrates                                                                                 |
| Respiratory failure                    | Defined as a postoperative $PaO_2 < 60$ mmHg on room air, a $PaO_2 / FiO_2$ ratio $< 300$ mmHg or arterial oxyhaemoglobin saturation measured with pulse oximetry $< 90\%$ and requiring oxygen therapy                                                                                                          |
| Pleural effusion                       | Defined as chest radiograph demonstrating blunting of the costophrenic angle, loss of sharp silhouette of the ipsilateral hemidiaphragm in upright position, evidence of displacement of adjacent anatomical structures or (in supine position) a hazy opacity in one hemithorax with preserved vascular shadows |
| Pneumothorax                           | Defined as air in the pleural space with no vascular bed surrounding the visceral pleura                                                                                                                                                                                                                         |
| Requirement for mechanical ventilation | Defined as unplanned need of non-invasive or invasive ventilation                                                                                                                                                                                                                                                |

| <b>eTable 2. Definitions of the Secondary Outcomes</b>                                                                                            |                                                                                                                                                                                                                                                                                                                                                                                                                                                                                                                                                                                                                                                                                                                                                                                                                                     |
|---------------------------------------------------------------------------------------------------------------------------------------------------|-------------------------------------------------------------------------------------------------------------------------------------------------------------------------------------------------------------------------------------------------------------------------------------------------------------------------------------------------------------------------------------------------------------------------------------------------------------------------------------------------------------------------------------------------------------------------------------------------------------------------------------------------------------------------------------------------------------------------------------------------------------------------------------------------------------------------------------|
| <b>Outcome</b>                                                                                                                                    | <b>Definition</b>                                                                                                                                                                                                                                                                                                                                                                                                                                                                                                                                                                                                                                                                                                                                                                                                                   |
| Postoperative pulmonary complications during hospital stay                                                                                        | As defined in eTable 1 but considering the whole hospital stay                                                                                                                                                                                                                                                                                                                                                                                                                                                                                                                                                                                                                                                                                                                                                                      |
| Pulmonary embolism                                                                                                                                | Presence of segmental or subsegmental pulmonary embolus diagnosed on computerized tomography or high probability pulmonary embolus on ventilator-perfusion scan                                                                                                                                                                                                                                                                                                                                                                                                                                                                                                                                                                                                                                                                     |
| Acute respiratory distress syndrome                                                                                                               | According to Berlin definition                                                                                                                                                                                                                                                                                                                                                                                                                                                                                                                                                                                                                                                                                                                                                                                                      |
| SIRS                                                                                                                                              | Two or more of the following: <ul style="list-style-type: none"> <li>• Temperature &lt; 36 °C or &gt; 38 °C; or</li> <li>• Heart rate &gt; 90 beats per minute; or</li> <li>• Respiratory rate &gt; 20 breaths per minute; or, PaCO<sub>2</sub> &lt; 32 mmHg; or</li> <li>• White blood cell count &lt; 4000 cells/mm<sup>3</sup> or &gt; 12000 cells/mm<sup>3</sup>; or more than 10% immature neutrophils (band forms).</li> </ul>                                                                                                                                                                                                                                                                                                                                                                                                |
| Sepsis                                                                                                                                            | SIRS criteria plus a definitive or presumed infectious foci                                                                                                                                                                                                                                                                                                                                                                                                                                                                                                                                                                                                                                                                                                                                                                         |
| Acute kidney injury                                                                                                                               | According to RIFLE criteria: <ul style="list-style-type: none"> <li>• Risk: 1.5-fold increase in the serum creatinine, GFR decrease by 25%, or urine output &lt; 0.5 mL/kg per hour for 6 hours; or</li> <li>• Injury: Two-fold increase in the serum creatinine, or GFR decrease by 50%, or urine output &lt; 0.5 mL/kg per hour for 12 hours; or</li> <li>• Failure: Three-fold increase in the serum creatinine, or GFR decrease by 75%, or urine output of &lt; 0.3 mL/kg per hour for 24 hours, or no urine output (anuria) for 12 hours; or</li> <li>• Loss: Complete loss of kidney function (e.g., need for renal replacement therapy) for more than four weeks; or</li> <li>• End-stage kidney disease: Complete loss of kidney function (e.g., need for renal replacement therapy) for more than three months.</li> </ul> |
| Wound infection                                                                                                                                   | Superficial or deep surgical site infection according to CDC definition in the first seven days                                                                                                                                                                                                                                                                                                                                                                                                                                                                                                                                                                                                                                                                                                                                     |
| Intraoperative need of vasopressor                                                                                                                | Defined as the need of aramine, norepinephrine, ephedrine, phenylephrine, epinephrine and/or vasopressin in the intraoperative period                                                                                                                                                                                                                                                                                                                                                                                                                                                                                                                                                                                                                                                                                               |
| Unplanned ICU admission                                                                                                                           | Any admission that was not previously planned in the plan of care                                                                                                                                                                                                                                                                                                                                                                                                                                                                                                                                                                                                                                                                                                                                                                   |
| Need for rapid response team call                                                                                                                 | Any call for the rapid response team while in the ward                                                                                                                                                                                                                                                                                                                                                                                                                                                                                                                                                                                                                                                                                                                                                                              |
| ICU length of stay                                                                                                                                | Days from ICU admission to ICU discharge                                                                                                                                                                                                                                                                                                                                                                                                                                                                                                                                                                                                                                                                                                                                                                                            |
| Hospital length of stay                                                                                                                           | Days from hospital admission to hospital discharge                                                                                                                                                                                                                                                                                                                                                                                                                                                                                                                                                                                                                                                                                                                                                                                  |
| Hospital mortality                                                                                                                                | Death from any cause during hospital stay                                                                                                                                                                                                                                                                                                                                                                                                                                                                                                                                                                                                                                                                                                                                                                                           |
| <i>ICU: intensive care unit; SIRS: systemic inflammatory response syndrome; CDC: Centers for Disease Control; GFR: glomerular filtration rate</i> |                                                                                                                                                                                                                                                                                                                                                                                                                                                                                                                                                                                                                                                                                                                                                                                                                                     |

**eTable 3. Missing Values for Study Variables**

|                                   | <b>Total<br/>(n = 1206)</b> | <b>Low Tidal Volume<br/>(n = 614)</b> | <b>Conventional Tidal Volume<br/>(n = 592)</b> |
|-----------------------------------|-----------------------------|---------------------------------------|------------------------------------------------|
| Age                               | 3 (0.2)                     | 1 (0.2)                               | 2 (0.3)                                        |
| Gender                            | 0 (0.0)                     | 0 (0.0)                               | 0 (0.0)                                        |
| Weight                            | 7 (0.6)                     | 2 (0.3)                               | 5 (0.8)                                        |
| ARISCAT                           | 134 (11.1)                  | 60 (9.8)                              | 74 (12.5)                                      |
| Preoperative SpO <sub>2</sub>     | 13 (1.1)                    | 6 (1.0)                               | 7 (1.2)                                        |
| Preoperative HCO <sub>3</sub>     | 37 (3.1)                    | 13 (2.1)                              | 24 (4.1)                                       |
| Preoperative hemoglobin           | 29 (2.4)                    | 8 (1.3)                               | 21 (3.5)                                       |
| Preoperative creatinine           | 356 (29.5)                  | 172 (28.0)                            | 184 (31.1)                                     |
| Diabetes mellitus                 | 2 (0.2)                     | 1 (0.2)                               | 1 (0.2)                                        |
| Hypertension                      | 2 (0.2)                     | 1 (0.2)                               | 1 (0.2)                                        |
| Coronary artery disease           | 2 (0.2)                     | 1 (0.2)                               | 1 (0.2)                                        |
| Chronic renal disease             | 2 (0.2)                     | 1 (0.2)                               | 1 (0.2)                                        |
| Chronic liver disease             | 2 (0.2)                     | 1 (0.2)                               | 1 (0.2)                                        |
| Current smoker                    | 0 (0.0)                     | 0 (0.0)                               | 0 (0.0)                                        |
| COPD                              | 0 (0.0)                     | 0 (0.0)                               | 0 (0.0)                                        |
| Asthma                            | 0 (0.0)                     | 0 (0.0)                               | 0 (0.0)                                        |
| Interstitial lung disease         | 0 (0.0)                     | 0 (0.0)                               | 0 (0.0)                                        |
| Bronchiectasis                    | 0 (0.0)                     | 0 (0.0)                               | 0 (0.0)                                        |
| Obstructive sleep apnea           | 0 (0.0)                     | 0 (0.0)                               | 0 (0.0)                                        |
| Obesity                           | 49 (4.1)                    | 19 (3.1)                              | 30 (5.1)                                       |
| Recent LRTI                       | 0 (0.0)                     | 0 (0.0)                               | 0 (0.0)                                        |
| Type of Surgery                   | 1 (0.1)                     | 0 (0.0)                               | 1 (0.2)                                        |
| Tidal volume                      | 24 (2.0)                    | 14 (2.3)                              | 10 (1.7)                                       |
| PEEP                              | 0 (0.0)                     | 0 (0.0)                               | 0 (0.0)                                        |
| Highest peak pressure             | 43 (3.6)                    | 23 (3.7)                              | 20 (3.4)                                       |
| Lowest respiratory rate           | 29 (2.4)                    | 20 (3.3)                              | 9 (1.5)                                        |
| Highest respiratory rate          | 27 (2.2)                    | 17 (2.8)                              | 10 (1.7)                                       |
| Lowest SpO <sub>2</sub>           | 22 (1.8)                    | 15 (2.4)                              | 7 (1.2)                                        |
| Lowest FiO <sub>2</sub>           | 28 (2.3)                    | 17 (2.8)                              | 11 (1.9)                                       |
| Highest FiO <sub>2</sub>          | 27 (2.2)                    | 17 (2.8)                              | 10 (1.7)                                       |
| Highest etCO <sub>2</sub>         | 27 (2.2)                    | 15 (2.4)                              | 12 (2.0)                                       |
| pH after induction                | 76 (6.3)                    | 39 (6.4)                              | 37 (6.2)                                       |
| PaO <sub>2</sub> after induction  | 76 (6.3)                    | 37 (6.0)                              | 39 (6.6)                                       |
| PaCO <sub>2</sub> after induction | 74 (6.1)                    | 37 (6.0)                              | 37 (6.2)                                       |

**eTable 3. Missing Values for Study Variables**

|                                                     | <b>Total<br/>(n = 1206)</b> | <b>Low Tidal Volume<br/>(n = 614)</b> | <b>Conventional Tidal Volume<br/>(n = 592)</b> |
|-----------------------------------------------------|-----------------------------|---------------------------------------|------------------------------------------------|
| HCO <sub>3</sub> after induction                    | 85 (7.0)                    | 44 (7.2)                              | 41 (6.9)                                       |
| PaO <sub>2</sub> / FiO <sub>2</sub> after induction | 101 (8.4)                   | 48 (7.8)                              | 53 (9.0)                                       |
| Hemoglobin after induction                          | 74 (6.1)                    | 38 (6.2)                              | 36 (6.1)                                       |
| Base excess after induction                         | 88 (7.3)                    | 43 (7.0)                              | 45 (7.6)                                       |
| Lactate after induction                             | 119 (9.9)                   | 55 (9.0)                              | 64 (10.8)                                      |
| pH prior closure                                    | 114 (9.5)                   | 60 (9.8)                              | 54 (9.1)                                       |
| PaO <sub>2</sub> prior closure                      | 115 (9.5)                   | 60 (9.8)                              | 55 (9.3)                                       |
| PaCO <sub>2</sub> prior closure                     | 112 (9.3)                   | 58 (9.4)                              | 54 (9.1)                                       |
| HCO <sub>3</sub> prior closure                      | 115 (9.5)                   | 61 (9.9)                              | 54 (9.1)                                       |
| PaO <sub>2</sub> / FiO <sub>2</sub> prior closure   | 138 (11.4)                  | 71 (11.6)                             | 67 (11.3)                                      |
| Hemoglobin prior closure                            | 110 (9.1)                   | 57 (9.3)                              | 53 (9.0)                                       |
| Base excess prior closure                           | 120 (10.0)                  | 63 (10.3)                             | 57 (9.6)                                       |
| Lactate prior closure                               | 154 (12.8)                  | 76 (12.4)                             | 78 (13.2)                                      |
| Duration of surgery                                 | 19 (1.6)                    | 10 (1.6)                              | 9 (1.5)                                        |
| Use of regional anesthesia                          | 21 (1.7)                    | 14 (2.3)                              | 7 (1.2)                                        |
| Aramine                                             | 21 (1.7)                    | 14 (2.3)                              | 7 (1.2)                                        |
| Ephedrine                                           | 21 (1.7)                    | 13 (2.1)                              | 8 (1.4)                                        |
| Phenylephrine                                       | 20 (1.7)                    | 13 (2.1)                              | 7 (1.2)                                        |
| Norepinephrine                                      | 22 (1.8)                    | 14 (2.3)                              | 8 (1.4)                                        |
| Epinephrine                                         | 22 (1.8)                    | 15 (2.4)                              | 7 (1.2)                                        |
| Vasopressin                                         | 21 (1.7)                    | 14 (2.3)                              | 7 (1.2)                                        |
| Morphine                                            | 24 (2.0)                    | 14 (2.3)                              | 10 (1.7)                                       |
| Fentanyl                                            | 24 (2.0)                    | 14 (2.3)                              | 10 (1.7)                                       |
| Remifentanyl                                        | 24 (2.0)                    | 14 (2.3)                              | 10 (1.7)                                       |
| Highest SpO <sub>2</sub> at PACU                    | 51 (4.2)                    | 30 (4.9)                              | 21 (3.5)                                       |
| Lowest SpO <sub>2</sub> at PACU                     | 50 (4.1)                    | 30 (4.9)                              | 20 (3.4)                                       |
| Highest respiratory rate at PACU                    | 49 (4.1)                    | 29 (4.7)                              | 20 (3.4)                                       |
| Lowest respiratory rate at PACU                     | 49 (4.1)                    | 29 (4.7)                              | 20 (3.4)                                       |
| Highest oxygen flow at PACU                         | 53 (4.4)                    | 30 (4.9)                              | 23 (3.9)                                       |
| Lowest oxygen flow at PACU                          | 53 (4.4)                    | 30 (4.9)                              | 23 (3.9)                                       |
| Ventilatory support                                 | 45 (3.7)                    | 28 (4.6)                              | 17 (2.9)                                       |
| Anesthesiologist review at PACU                     | 32 (2.7)                    | 21 (3.4)                              | 11 (1.9)                                       |
| Morphine at PACU                                    | 33 (2.7)                    | 20 (3.3)                              | 13 (2.2)                                       |
| Fentanyl at PACU                                    | 34 (2.8)                    | 19 (3.1)                              | 15 (2.5)                                       |

**eTable 3. Missing Values for Study Variables**

|                                                          | <b>Total<br/>(n = 1206)</b> | <b>Low Tidal Volume<br/>(n = 614)</b> | <b>Conventional Tidal Volume<br/>(n = 592)</b> |
|----------------------------------------------------------|-----------------------------|---------------------------------------|------------------------------------------------|
| Remifentanyl at PACU                                     | 35 (2.9)                    | 19 (3.1)                              | 16 (2.7)                                       |
| Pethidine at PACU                                        | 33 (2.7)                    | 19 (3.1)                              | 14 (2.4)                                       |
| Other opioid at PACU                                     | 35 (2.9)                    | 20 (3.3)                              | 15 (2.5)                                       |
| pH at PACU                                               | 152 (12.6)                  | 80 (13.0)                             | 72 (12.2)                                      |
| PaO <sub>2</sub> at PACU                                 | 153 (12.7)                  | 80 (13.0)                             | 73 (12.3)                                      |
| PaCO <sub>2</sub> at PACU                                | 151 (12.5)                  | 79 (12.9)                             | 72 (12.2)                                      |
| HCO <sub>3</sub> at PACU                                 | 156 (12.9)                  | 82 (13.4)                             | 74 (12.5)                                      |
| PaO <sub>2</sub> / FiO <sub>2</sub> at PACU              | 199 (16.5)                  | 100 (16.3)                            | 99 (16.7)                                      |
| Hemoglobin at PACU                                       | 159 (13.2)                  | 83 (13.5)                             | 76 (12.8)                                      |
| Base excess at PACU                                      | 151 (12.5)                  | 80 (13.0)                             | 71 (12.0)                                      |
| Lactate at PACU                                          | 194 (16.1)                  | 95 (15.5)                             | 99 (16.7)                                      |
| ICU admission after PACU                                 | 30 (2.5)                    | 19 (3.1)                              | 11 (1.9)                                       |
| Components of the primary outcome                        | 8 (0.7)                     | 6 (1.0)                               | 2 (0.3)                                        |
| Pneumonia                                                | 5 (0.4)                     | 4 (0.7)                               | 1 (0.2)                                        |
| Respiratory failure                                      | 4 (0.3)                     | 2 (0.3)                               | 2 (0.3)                                        |
| Pleural effusion                                         | 5 (0.4)                     | 3 (0.5)                               | 2 (0.3)                                        |
| Atelectasis                                              | 7 (0.6)                     | 6 (1.0)                               | 1 (0.2)                                        |
| Pneumothorax                                             | 4 (0.3)                     | 3 (0.5)                               | 1 (0.2)                                        |
| Bronchospasm                                             | 4 (0.3)                     | 2 (0.3)                               | 2 (0.3)                                        |
| Pulmonary congestion                                     | 3 (0.2)                     | 2 (0.3)                               | 1 (0.2)                                        |
| Unplanned non-invasive or invasive ventilation           | 3 (0.2)                     | 2 (0.3)                               | 1 (0.2)                                        |
| Composite respiratory complications during hospital stay | 29 (2.4)                    | 16 (2.6)                              | 13 (2.2)                                       |
| Pulmonary embolism                                       | 38 (3.2)                    | 19 (3.1)                              | 19 (3.2)                                       |
| Acute respiratory distress syndrome                      | 38 (3.2)                    | 20 (3.3)                              | 18 (3.0)                                       |
| SIRS                                                     | 3 (0.2)                     | 2 (0.3)                               | 1 (0.2)                                        |
| Sepsis                                                   | 3 (0.2)                     | 2 (0.3)                               | 1 (0.2)                                        |
| Acute kidney injury                                      | 392 (32.5)                  | 194 (31.6)                            | 198 (33.4)                                     |
| Wound infection                                          | 34 (2.8)                    | 17 (2.8)                              | 17 (2.9)                                       |
| Intraoperative need of vasopressor                       | 22 (1.8)                    | 14 (2.3)                              | 8 (1.4)                                        |
| Unplanned ICU admission                                  | 34 (2.8)                    | 19 (3.1)                              | 15 (2.5)                                       |
| Need for MET call                                        | 3 (0.2)                     | 2 (0.3)                               | 1 (0.2)                                        |
| ICU length of stay                                       | 24 (2.0)                    | 16 (2.6)                              | 8 (1.4)                                        |
| Hospital length of stay                                  | 0 (0.0)                     | 0 (0.0)                               | 0 (0.0)                                        |
| Hospital mortality                                       | 2 (0.2)                     | 0 (0.0)                               | 2 (0.3)                                        |



**eTable 4. Detailed Description of Surgical Procedures**

|                                    | Low Tidal Volume<br>(n = 614) | Conventional Tidal Volume<br>(n = 592) |
|------------------------------------|-------------------------------|----------------------------------------|
| Biliary drainage                   | 2 (0.3)                       | 0 (0.0)                                |
| Any biopsy or excision             | 7 (1.2)                       | 9 (1.6)                                |
| Carotid surgery                    | 5 (0.9)                       | 6 (1.1)                                |
| Closure of ileostomy               | 4 (0.7)                       | 4 (0.7)                                |
| Colostomy                          | 3 (0.5)                       | 3 (0.5)                                |
| Endoscopic urological surgery      | 4 (0.7)                       | 3 (0.5)                                |
| Parotid excision                   | 2 (0.3)                       | 1 (0.2)                                |
| Tongue excision                    | 1 (0.2)                       | 1 (0.2)                                |
| Incisional hernia                  | 10 (1.7)                      | 5 (0.9)                                |
| Kidney transplant                  | 4 (0.7)                       | 11 (2.0)                               |
| Laparoscopic division of adhesions | 2 (0.4)                       | 4 (0.7)                                |
| Laparoscopic appendectomy          | 0 (0.0)                       | 1 (0.2)                                |
| Laparoscopic bariatric surgery     | 9 (1.6)                       | 11 (2.0)                               |
| Laparoscopic cholecystectomy       | 4 (0.7)                       | 3 (0.5)                                |
| Laparoscopic colorectal surgery    | 34 (5.9)                      | 33 (6.0)                               |
| Laparoscopic small bowel resection | 1 (0.2)                       | 1 (0.2)                                |
| Laparoscopic hernia repair         | 1 (0.2)                       | 2 (0.4)                                |
| Laparoscopic hiatus hernia repair  | 2 (0.3)                       | 4 (0.7)                                |
| Laparoscopic lymphadenectomy       | 0 (0.0)                       | 1 (0.2)                                |
| Laparoscopic nephrectomy           | 20 (3.5)                      | 30 (5.5)                               |
| Laparoscopic pancreatectomy        | 1 (0.2)                       | 1 (0.2)                                |
| Laparoscopic pelvic surgery        | 1 (0.2)                       | 0 (0.0)                                |
| Laparoscopic prostatectomy         | 21 (3.6)                      | 17 (3.1)                               |
| Laparoscopic pyeloplasty           | 1 (0.2)                       | 0 (0.0)                                |
| Laparoscopic splenectomy           | 1 (0.2)                       | 2 (0.4)                                |
| Mastectomy                         | 17 (3.0)                      | 16 (2.9)                               |
| Mediastinotomy                     | 1 (0.2)                       | 0 (0.0)                                |
| Neck lymphadenectomy               | 2 (0.3)                       | 4 (0.7)                                |
| Open division of adhesions         | 3 (0.5)                       | 3 (0.5)                                |
| Open adrenalectomy                 | 3 (0.5)                       | 2 (0.4)                                |
| Open bariatric                     | 1 (0.2)                       | 2 (0.4)                                |
| Open biliary procedures            | 8 (1.4)                       | 4 (0.7)                                |
| Open bladder surgery               | 12 (2.1)                      | 5 (0.9)                                |
| Open cholecystectomy               | 1 (0.2)                       | 1 (0.2)                                |
| Open colorectal surgery            | 59 (10.2)                     | 51 (9.3)                               |
| Open tumor debulking surgery       | 1 (0.2)                       | 0 (0.0)                                |
| Open small bowel resection         | 6 (1.0)                       | 6 (1.1)                                |
| Open esophagectomy                 | 1 (0.2)                       | 0 (0.0)                                |
| Open gastrectomy                   | 3 (0.5)                       | 5 (0.9)                                |
| Open partial hepatectomy           | 32 (5.6)                      | 33 (6.0)                               |
| Open hernia repair                 | 2 (0.3)                       | 7 (1.3)                                |
| Open hiatus hernia repair          | 0 (0.0)                       | 1 (0.2)                                |
| Open hysterectomy                  | 3 (0.5)                       | 0 (0.0)                                |
| Open lymphadenectomy               | 2 (0.3)                       | 0 (0.0)                                |
| Open nephrectomy                   | 5 (0.9)                       | 2 (0.4)                                |
| Open pancreatectomy                | 23 (4.0)                      | 20 (3.6)                               |
| Open pelvic surgery                | 1 (0.2)                       | 0 (0.0)                                |
| Open prostatectomy                 | 32 (5.6)                      | 32 (5.8)                               |
| Peripheral orthopedic surgery      | 43 (7.0)                      | 46 (7.8)                               |
| Parathyroidectomy                  | 1 (0.2)                       | 1 (0.2)                                |
| Other peripheral surgery           | 7 (1.2)                       | 4 (0.7)                                |
| Breast reconstruction              | 12 (2.1)                      | 10 (1.8)                               |
| Repair of enterocutaneous fistula  | 2 (0.3)                       | 0 (0.0)                                |
| Head and neck resection            | 5 (0.9)                       | 3 (0.6)                                |
| Spinal surgery                     | 125 (20.4)                    | 120 (20.3)                             |

**eTable 4. Detailed Description of Surgical Procedures**

|                    | <b>Low Tidal Volume<br/>(n = 614)</b> | <b>Conventional Tidal Volume<br/>(n = 592)</b> |
|--------------------|---------------------------------------|------------------------------------------------|
| Stoma correction   | 1 (0.2)                               | 4 (0.7)                                        |
| Thyroidectomy      | 7 (1.2)                               | 4 (0.7)                                        |
| Vascular procedure | 29 (4.7)                              | 28 (4.7)                                       |

| <b>eTable 5. Additional Intraoperative Data</b> |                                       |                                                |                |
|-------------------------------------------------|---------------------------------------|------------------------------------------------|----------------|
|                                                 | <b>Low Tidal Volume<br/>(n = 614)</b> | <b>Conventional Tidal Volume<br/>(n = 592)</b> | <b>p value</b> |
| Use of vasoactive drugs                         |                                       |                                                |                |
| Metaraminol, bolus                              | 451 (75.2)                            | 457 (78.1)                                     | .26            |
| Metaraminol, infusion                           | 7 (1.1)                               | 12 (2.0)                                       | .32            |
| Ephedrine                                       | 256 (42.6)                            | 251 (43.0)                                     | .94            |
| Dose, mg                                        | 16.9 ± 11.6                           | 16.3 ± 11.6                                    | .55            |
| Phenylephrine                                   | 2 (0.3)                               | 2 (0.3)                                        | .99            |
| Dose, µg                                        | 5.4 ± 3.7                             | 2.5 ± 3.5                                      | .51            |
| Norepinephrine                                  | 40 (6.7)                              | 26 (4.5)                                       | .12            |
| Dose, µg/kg                                     | 9.0 ± 7.0                             | 6.9 ± 4.7                                      | .19            |
| Epinephrine                                     | 6 (1.0)                               | 1 (0.2)                                        | .14            |
| Dose, µg/kg                                     | 6.7 ± 7.8                             | 1.0                                            | ---            |
| Vasopressin                                     | 3 (0.5)                               | 0 (0.0)                                        | .26            |
| Dose, U/min                                     | 1.0 ± 0.9                             | ---                                            | ---            |
| Use of opioids                                  |                                       |                                                |                |
| Morphine                                        | 140 (23.3)                            | 121 (20.8)                                     | .32            |
| Dose, mg                                        | 10.1 ± 4.9                            | 9.6 ± 4.5                                      | .45            |
| Fentanyl                                        | 465 (77.5)                            | 452 (77.7)                                     | .99            |
| Dose, µg                                        | 362.7 ± 184.0                         | 364.6 ± 186.4                                  | .88            |
| Remifentanyl                                    | 121 (20.2)                            | 115 (19.8)                                     | .92            |

Data are presented as mean ± standard deviation or N (%)

**eTable 6. Postoperative Characteristics**

|                                     | Low Tidal Volume<br>(n = 614) | Conventional Tidal Volume<br>(n = 592) | Absolute Difference<br>(95% CI) | p value |
|-------------------------------------|-------------------------------|----------------------------------------|---------------------------------|---------|
| Vital signs at PACU                 |                               |                                        |                                 |         |
| SpO <sub>2</sub> , %                |                               |                                        |                                 |         |
| Highest                             | 99.8 ± 1.0                    | 99.8 ± 0.7                             | -0.0 (-0.1 to 0.0)*             | .31     |
| Lowest                              | 98.1 ± 2.8                    | 98.3 ± 2.3                             | -0.2 (-0.5 to 0.1)*             | .19     |
| Respiratory rate, bpm               |                               |                                        |                                 |         |
| Highest                             | 18.4 ± 3.4                    | 18.6 ± 3.6                             | -0.2 (-0.6 to 0.2)*             | .24     |
| Lowest                              | 11.7 ± 2.6                    | 12.1 ± 3.0                             | -0.3 (-0.7 to -0.0)*            | .03     |
| Oxygen flow, L/min                  |                               |                                        |                                 |         |
| Highest                             | 6.1 ± 0.9                     | 6.1 ± 1.2                              | 0.0 (-0.1 to 0.1)*              | .72     |
| Lowest                              | 4.0 ± 2.0                     | 4.0 ± 2.1                              | 0.1 (-0.2 to 0.3)*              | .60     |
| Ventilatory support at PACU         |                               |                                        |                                 |         |
| CPAP                                | 3 (0.5)                       | 7 (1.2)                                | -0.7 (-1.9 to 0.4)**            | .19     |
| NIV                                 | 1 (0.2)                       | 3 (0.5)                                | -0.3 (-1.2 to 0.4)**            | .31     |
| Reintubation                        | 0 (0.0)                       | 2 (0.3)                                | -0.3 (-0.8 to 0.1)**            | .15     |
| Anesthesiologist review at PACU     | 169 (28.5)                    | 147 (25.3)                             | 3.2 (-1.9 to 8.3)**             | .22     |
| Use of opioids at PACU              |                               |                                        |                                 |         |
| Morphine                            | 98 (16.5)                     | 109 (18.8)                             | -2.3 (-6.7 to 2.0)**            | .30     |
| Dose, mg                            | 7.8 ± 4.9                     | 8.0 ± 5.2                              | -0.3 (-1.6 to 1.1)*             | .72     |
| Fentanyl                            | 215 (36.1)                    | 201 (34.8)                             | 1.3 (-4.2 to 6.8)**             | .64     |
| Dose, µg                            | 88.5 ± 60.7                   | 90.9 ± 63.8                            | -2.4 (-14.4 to 9.6)*            | .69     |
| Remifentanyl                        | 1 (0.2)                       | 0 (0.0)                                | 0.2 (-0.2 to 0.5)**             | .32     |
| Pethidine                           | 1 (0.2)                       | 0 (0.0)                                | 0.2 (-0.2 to 0.5)**             | .32     |
| Other opioid                        | 85 (14.3)                     | 96 (16.6)                              | -2.3 (-6.5 to 1.8)**            | .27     |
| ABG at PACU admission               |                               |                                        |                                 |         |
| pH                                  | 7.34 ± 0.05                   | 7.34 ± 0.05                            | 0.00 (-0.01 to 0.00)*           | .39     |
| PaO <sub>2</sub> , mmHg             | 160.9 ± 59.9                  | 159.2 ± 56.1                           | 1.7 (-5.3 to 8.7)*              | .64     |
| PaCO <sub>2</sub> , mmHg            | 45.3 ± 6.9                    | 44.9 ± 6.8                             | 0.4 (-0.4 to 1.2)*              | .33     |
| HCO <sub>3</sub> , mmol/L           | 23.7 ± 2.3                    | 23.7 ± 2.6                             | -0.0 (-0.3 to 0.3)*             | .93     |
| PaO <sub>2</sub> / FiO <sub>2</sub> | 414.1 ± 143.2                 | 411.6 ± 131.5                          | 2.4 (-14.6 to 19.4)*            | .78     |
| Base excess                         | -1.4 ± 2.5                    | -1.3 ± 2.7                             | -0.1 (-0.4 to 0.2)*             | .62     |
| Hemoglobin, g/dL                    | 12.3 ± 2.0                    | 12.3 ± 1.8                             | -0.1 (-2.4 to 2.2)*             | .96     |
| Lactate, mmol/L                     | 1.6 ± 0.9                     | 1.6 ± 1.1                              | -0.1 (-0.2 to 0.1)*             | .35     |
| Hypoxemia <sup>a</sup>              | 3 (0.6)                       | 1 (0.2)                                | 0.4 (-0.4 to 1.3)**             | .33     |
| Acidosis <sup>b</sup>               | 87 (16.3)                     | 75 (14.4)                              | 1.9 (-2.5 to 6.2)**             | .40     |

**eTable 6. Postoperative Characteristics**

|                          | <b>Low Tidal Volume<br/>(n = 614)</b> | <b>Conventional Tidal Volume<br/>(n = 592)</b> | <b>Absolute Difference<br/>(95% CI)</b> | <b>p value</b> |
|--------------------------|---------------------------------------|------------------------------------------------|-----------------------------------------|----------------|
| Hypercapnia <sup>c</sup> | 9 (1.7)                               | 12 (2.3)                                       | -0.6 (-2.4 to 1.1)**                    | .47            |
| ICU admission after PACU |                                       |                                                |                                         |                |
| Planned                  | 136 (22.9)                            | 120 (20.7)                                     | 2.2 (-2.5 to 6.9)**                     | .36            |
| Unplanned                | 11 (1.9)                              | 13 (2.2)                                       | -0.4 (-2.1 to 1.3)**                    | .64            |

Data are presented as mean ± standard deviation or N (%)

ABG: arterial blood gas; CI: confidence interval; FiO<sub>2</sub>: inspired fraction of oxygen; HCO<sub>3</sub><sup>-</sup>: bicarbonate; PaO<sub>2</sub>: partial pressure of oxygen. PaCO<sub>2</sub>: partial pressure of carbon dioxide; SpO<sub>2</sub>: pulse oximetry; PACU: post-anaesthesia care unit; CPAP: continuous positive airway pressure; NIV: non-invasive ventilation

\* absolute difference is mean difference from a generalized linear model considering a Gaussian distribution

\*\* absolute difference is risk difference from a generalized linear model considering a Binomial distribution with an identity link

<sup>a</sup> defined as PaO<sub>2</sub> < 60 mmHg

<sup>b</sup> defined as pH < 7.30

<sup>c</sup> defined as PaCO<sub>2</sub> > 60 mmHg

**eTable 7. Protocol Violations and Reason for Violations**

|                                         | Total<br>(n=75) | Low Tidal Volume<br>(n = 41) | Conventional Tidal Volume<br>(n = 34) |
|-----------------------------------------|-----------------|------------------------------|---------------------------------------|
| <b>Protocol violations</b>              |                 |                              |                                       |
| Incorrect tidal volume*                 | 44              | 22                           | 22                                    |
| Incorrect PEEP                          | 6               | 4                            | 2                                     |
| Use of recruitment manoeuvre            | 3               | 2                            | 1                                     |
| Multiple protocol violations            | 3               | 2                            | 1                                     |
| <b>Reasons for protocol violations*</b> |                 |                              |                                       |
| Hypercapnia                             | 13              | 10                           | 3                                     |
| Hypoxia                                 | 3               | 3                            | 0                                     |
| High peak inspiratory pressure          | 9               | 2                            | 7                                     |

\* defined as a tidal volume different from the one calculated according to the randomization group in more than  $\pm 1$  mL/kg predicted body weight  
\*\* when available

| <b>eTable 8. Adjusted P Values for the Secondary Outcomes</b>                                                             |                               |                              |
|---------------------------------------------------------------------------------------------------------------------------|-------------------------------|------------------------------|
|                                                                                                                           | <b>Unadjusted<br/>p value</b> | <b>Adjusted<br/>p value*</b> |
| SIRS                                                                                                                      | 0.089942                      | 0.989362                     |
| Sepsis                                                                                                                    | 0.256753                      | 1.000000                     |
| Hospital LOS                                                                                                              | 0.396800                      | 1.000000                     |
| Intraoperative need of vasopressor                                                                                        | 0.551830                      | 1.000000                     |
| Composite respiratory complications during hospital stay                                                                  | 0.565142                      | 1.000000                     |
| Unplanned ICU admission                                                                                                   | 0.565970                      | 1.000000                     |
| Pulmonary embolism                                                                                                        | 0.714534                      | 1.000000                     |
| ICU LOS                                                                                                                   | 0.841244                      | 1.000000                     |
| In-hospital mortality                                                                                                     | 0.855448                      | 1.000000                     |
| Need for rapid response team call                                                                                         | 0.872292                      | 1.000000                     |
| Wound infection                                                                                                           | 0.893860                      | 1.000000                     |
| <i>ICU: intensive care unit;</i>                                                                                          |                               |                              |
| * Holm-Bonferroni correction to control the family-wide error rate to the p-values for all 11 secondary outcomes was done |                               |                              |

**eTable 9. Additional Sensitivity Analyses for the Primary Outcome**

|                                     | Low Tidal Volume<br>(n = 614) | Conventional Tidal<br>Volume<br>(n = 592) | Odds Ratio<br>(95% CI)           | p value          |
|-------------------------------------|-------------------------------|-------------------------------------------|----------------------------------|------------------|
| Adjusted analysis*                  | ---                           | ---                                       | 0.92 (0.71 to 1.20)              | .54              |
| Count events                        | 0.6 ± 1.0                     | 0.6 ± 1.0                                 | 0.94 (0.75 to 1.18)**            | .62              |
| Median (IQR)                        | 0 (0 – 1)                     | 0 (0 – 1)                                 |                                  |                  |
| Common effect GEE                   | ---                           | ---                                       | 0.94 (0.81 to 1.09)***           | .41              |
| Treatment–component interaction GEE | ---                           | ---                                       | ---                              | .72 <sup>a</sup> |
| Average relative effect GEE         | ---                           | ---                                       | 0.98 (0.94 to 1.03) <sup>b</sup> | .54              |

Data are presented as mean ± standard deviation or N (%)  
 GEE: *generalized estimating equations*  
 \* adjusted for age, gender, baseline SpO<sub>2</sub>, ARISCAT and hypertension  
 \*\* 95% confidence intervals calculated with proportional odds logistic regression and p values calculated Wilcoxon rank-sum test  
 \*\*\* 95% confidence intervals and p values calculated in a common effect GEE model (estimating a single treatment effect across all 8 components)  
<sup>a</sup> p value calculated in a GEE model (test whether the treatment effect differs across the 8 components)  
<sup>b</sup> p value calculated in a GEE model (estimating, then averaging, the 8 distinct treatment effects)



| <b>eTable 10. Primary and Secondary Outcomes Only in Patients Undergoing Laparoscopic Surgery</b> |                                       |                                                |                                         |                            |
|---------------------------------------------------------------------------------------------------|---------------------------------------|------------------------------------------------|-----------------------------------------|----------------------------|
|                                                                                                   | <b>No. of Events / Total No. (%)</b>  |                                                |                                         |                            |
|                                                                                                   | <b>Low Tidal Volume<br/>(n = 158)</b> | <b>Conventional Tidal Volume<br/>(n = 170)</b> | <b>Absolute Difference<br/>(95% CI)</b> | <b>p value<sup>c</sup></b> |
| <b>Primary outcome</b>                                                                            |                                       |                                                |                                         |                            |
| Composite respiratory complications within seven days                                             | 52 / 157 (33.1)                       | 72 / 169 (42.6)                                | -9.5 (-19.9 to 1.0)**                   | 0.08                       |
| Components of the primary outcome                                                                 |                                       |                                                |                                         |                            |
| Pneumonia                                                                                         | 6 / 158 (3.8)                         | 6 / 169 (3.6)                                  | 0.2 (-4.0 to 4.6)**                     | 0.91                       |
| Respiratory failure <sup>a</sup>                                                                  | 21 / 158 (13.3)                       | 33 / 169 (19.5)                                | -6.2 (-14.3 to 1.8)**                   | 0.13                       |
| Pleural effusion                                                                                  | 15 / 158 (9.5)                        | 16 / 169 (9.5)                                 | -0.0 (-6.5 to 6.5)**                    | 0.99                       |
| Atelectasis <sup>b</sup>                                                                          | 36 / 157 (22.9)                       | 48 / 170 (28.2)                                | -5.3 (-14.7 to 4.2)**                   | 0.27                       |
| Pneumothorax                                                                                      | 0 / 158 (0.0)                         | 0 / 169 (0.0)                                  | ---                                     | ---                        |
| Bronchospasm                                                                                      | 2 / 158 (1.3)                         | 3 / 169 (1.8)                                  | -0.5 (-3.6 to 2.5)**                    | 0.71                       |
| Pulmonary congestion                                                                              | 2 / 158 (1.3)                         | 4 / 169 (2.4)                                  | -1.1 (-4.4 to 2.0)**                    | 0.45                       |
| Unplanned non-invasive or invasive ventilation                                                    | 3 / 158 (1.9)                         | 4 / 169 (2.4)                                  | -0.5 (-3.9 to 3.0)**                    | 0.77                       |
| <b>Secondary outcomes</b>                                                                         |                                       |                                                |                                         |                            |
| Composite respiratory complications during hospital stay                                          | 53 / 157 (33.8)                       | 75 / 167 (44.9)                                | -11.1 (-21.6 to -0.5)**                 | 0.04                       |
| Pulmonary embolism                                                                                | 1 / 158 (0.6)                         | 1 / 166 (0.6)                                  | 0.0 (-2.2 to 2.3)**                     | 0.97                       |
| Acute respiratory distress syndrome                                                               | 0 / 158 (0.0)                         | 0 / 166 (0.0)                                  | ---                                     | ---                        |
| SIRS                                                                                              | 0 / 157 (0.0)                         | 1 / 169 (0.6)                                  | -0.6 (-1.8 to 0.6)**                    | 0.34                       |
| Sepsis                                                                                            | 7 / 158 (4.4)                         | 4 / 169 (2.4)                                  | 2.1 (-1.9 to 6.4)**                     | 0.30                       |
| Acute kidney injury <sup>d</sup>                                                                  | 11 / 115 (9.6)                        | 13 / 113 (11.5)                                | -1.9 (-10.1 to 6.1)**                   | 0.63                       |
| Risk                                                                                              | 8 / 11 (7.0)                          | 10 / 13 (8.8)                                  |                                         |                            |

**eTable 10. Primary and Secondary Outcomes Only in Patients Undergoing Laparoscopic Surgery**

|                                    | No. of Events / Total No. (%) |                                        | Absolute Difference<br>(95% CI) | p value <sup>c</sup> |
|------------------------------------|-------------------------------|----------------------------------------|---------------------------------|----------------------|
|                                    | Low Tidal Volume<br>(n = 158) | Conventional Tidal Volume<br>(n = 170) |                                 |                      |
| Injury                             | 1 / 11 (0.9)                  | 0 / 13 (0.0)                           |                                 |                      |
| Failure                            | 2 / 11 (1.7)                  | 3 / 13 (2.7)                           |                                 |                      |
| Wound infection                    | 3 / 158 (1.9)                 | 3 / 167 (1.8)                          | 0.1 (-3.1 to 3.4)**             | 0.94                 |
| Intraoperative need of vasopressor | 130 / 156 (83.3)              | 139 / 166 (83.7)                       | -0.4 (-8.6 to 7.7)**            | 0.92                 |
| Unplanned ICU admission            | 8 / 155 (5.2)                 | 7 / 165 (4.2)                          | 0.9 (-3.8 to 5.9)               | 0.70                 |
| Need for rapid response team call  | 12 / 158 (7.6)                | 14 / 169 (8.3)                         | -0.7 (-6.7 to 5.3)              | 0.82                 |
| Length of stay                     |                               |                                        |                                 |                      |
| In ICU, mean (SD), days            | 0.2 (0.8)                     | 0.3 (0.9)                              | 3.3 (-15.1 to 21.8)*            | 0.72                 |
| In hospital, mean (SD), days       | 7.0 (6.4)                     | 6.3 (5.7)                              | 0.6 (-0.7 to 2.0)*              | 0.33                 |
| In-hospital mortality              | 3 / 158 (1.9)                 | 2 / 170 (1.2)                          | 0.7 (-1.9 to 3.4)**             | 0.60                 |

Abbreviations: CI: confidence interval; ICU: intensive care unit;

<sup>a</sup> Defined as a postoperative PaO<sub>2</sub> < 60 mmHg on room air, a PaO<sub>2</sub> / FiO<sub>2</sub> ratio < 300 mmHg or arterial oxyhaemoglobin saturation measured with pulse oximetry < 90% and requiring oxygen therapy

<sup>b</sup> Defined as lung opacification with a shift of the mediastinum, hilum or hemidiaphragm toward the affected area, and compensatory over-inflation in the adjacent non-atelectatic lung

<sup>c</sup> Calculated using the  $\chi^2$  test for categorical variables or from a generalized linear model considering an inverse Gaussian distribution for the continuous variables

<sup>d</sup> Classified in 3 categories according to the stage of kidney injury. Acute kidney failure risk defined as an increase in creatinine level 1.5 times the baseline creatinine; injury, an increase in creatinine level 2 times the baseline creatinine; failure, an increase in creatinine level 3 times the baseline creatinine, or an increase in creatinine level  $\geq$  0.5 mg/dL if baseline creatinine  $\geq$  4 mg/dL

\* absolute difference is mean difference from a generalized linear model considering a Gaussian distribution

\*\* absolute difference is risk difference from a generalized linear model considering a Binomial distribution with an identity link

**eFigure 1. Trend Over Time for Arterial Blood Gases**

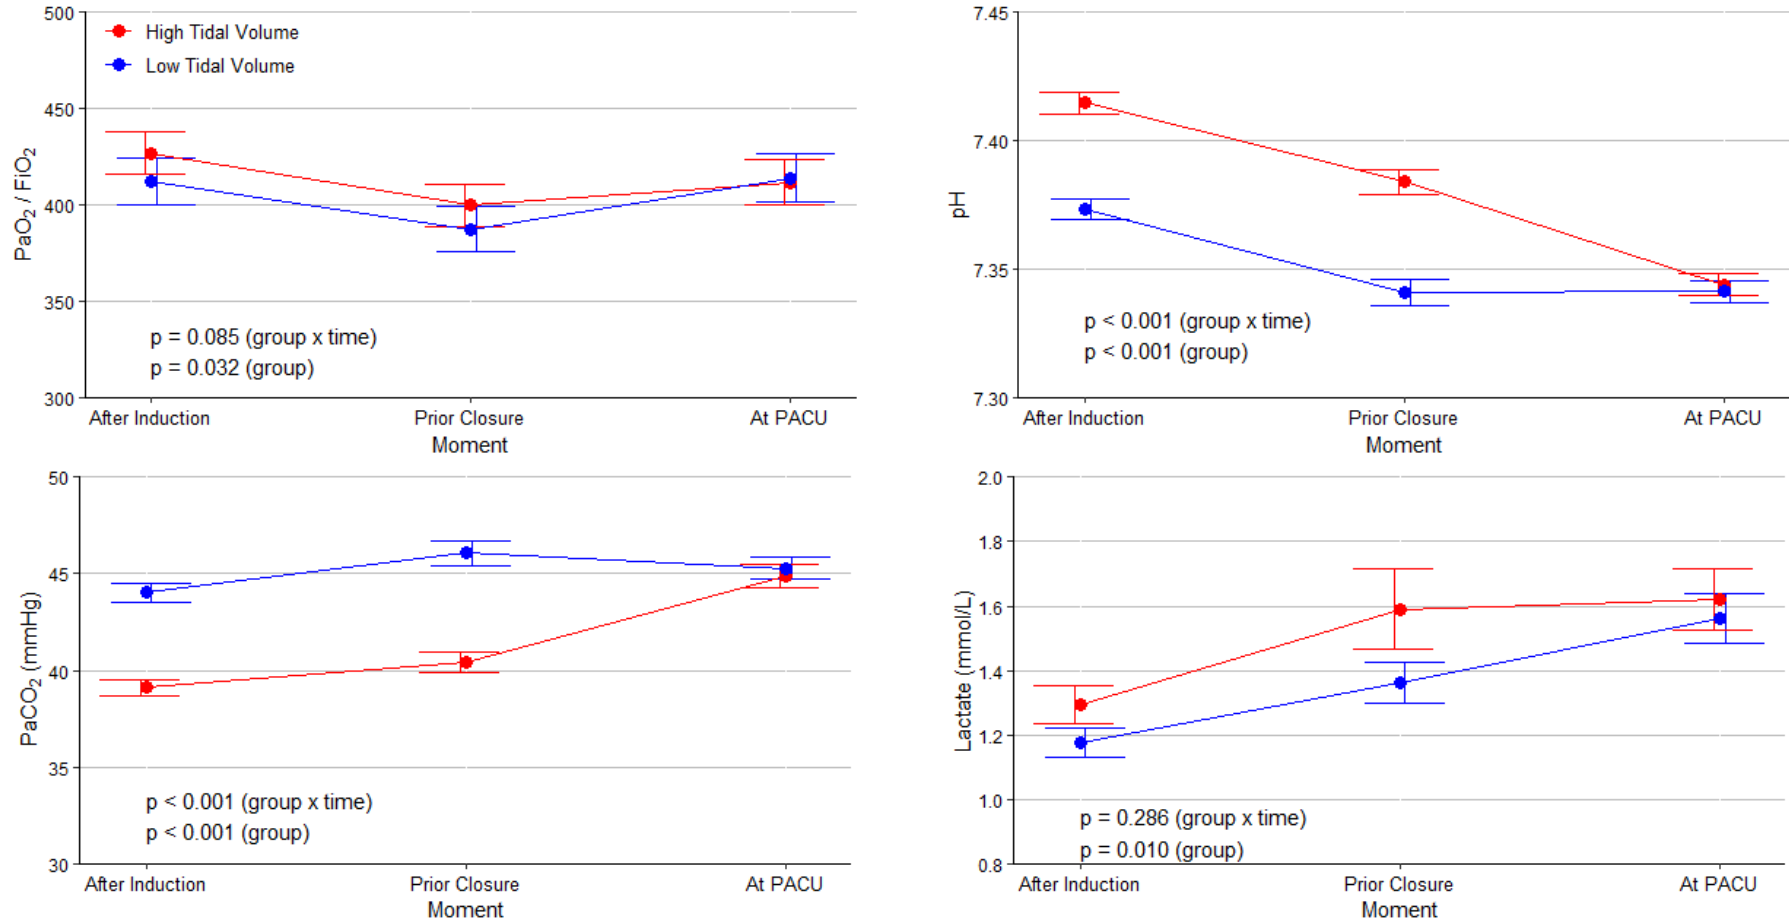

Circles are the mean and error bars the 95% confidence interval. Unadjusted mixed-effect longitudinal models with random intercept for patients and with group, time and the interaction of group x time as fixed effects. *P* values for the group reflect the overall test for difference between groups across the three periods while *p* values for the group x time interaction evaluate if change over time differed by group.

**eFigure 2. Kaplan-Meier Estimates for Patients in the Low Tidal Volume and Conventional Tidal Volume Groups**

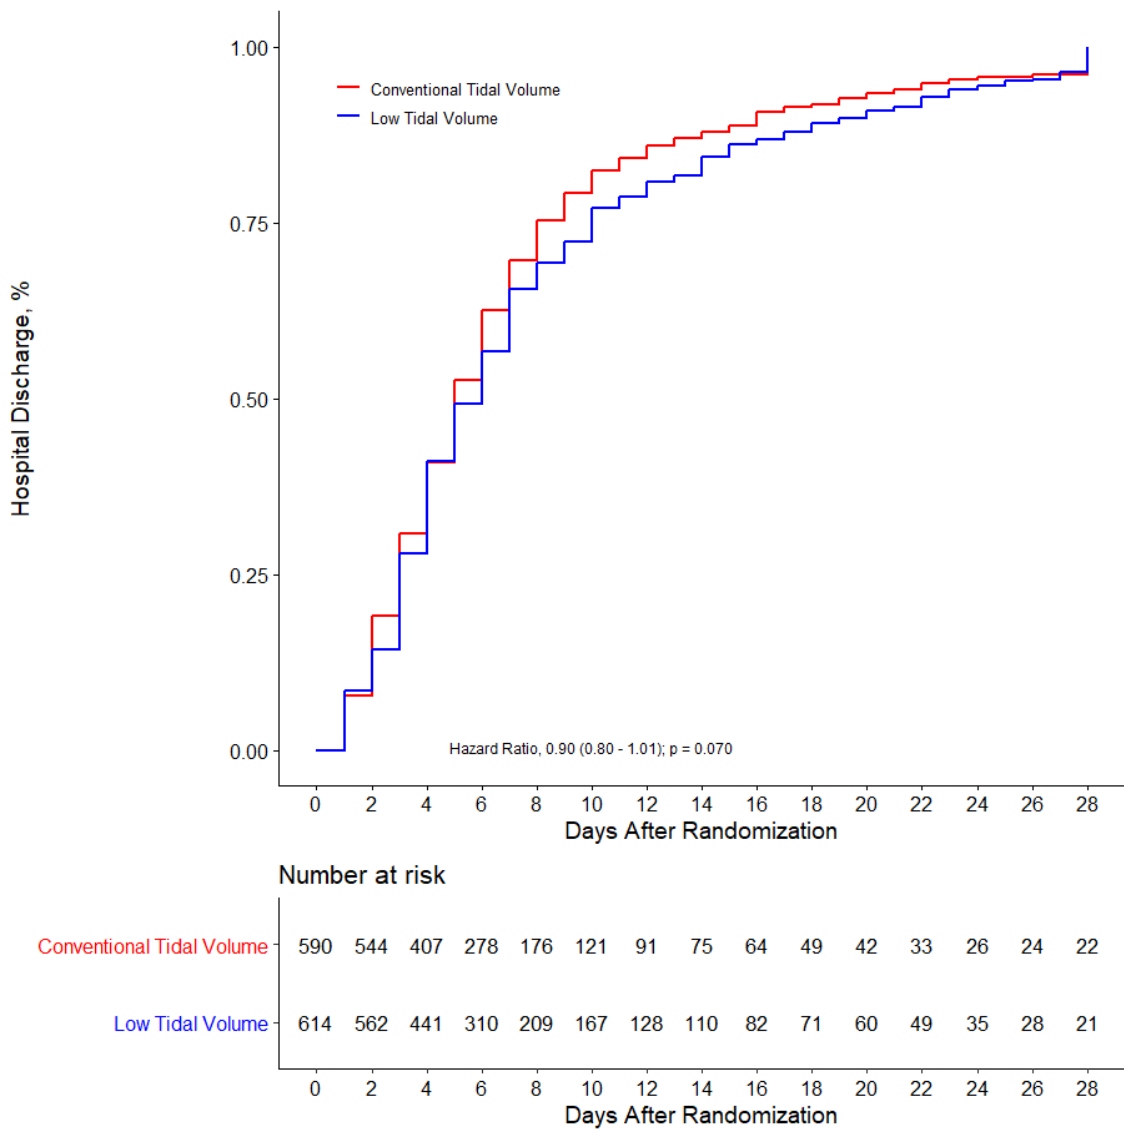

Median (IQR) observation period for hospital length of stay was 6 (3 to 10) days for the low tidal volume group and 5 (3 to 8) days for the conventional tidal volume group; P value for the Schoenfeld residuals was 0.664.

**eFigure 3. Results of the Sensitivity Analyses for the Primary Outcome**

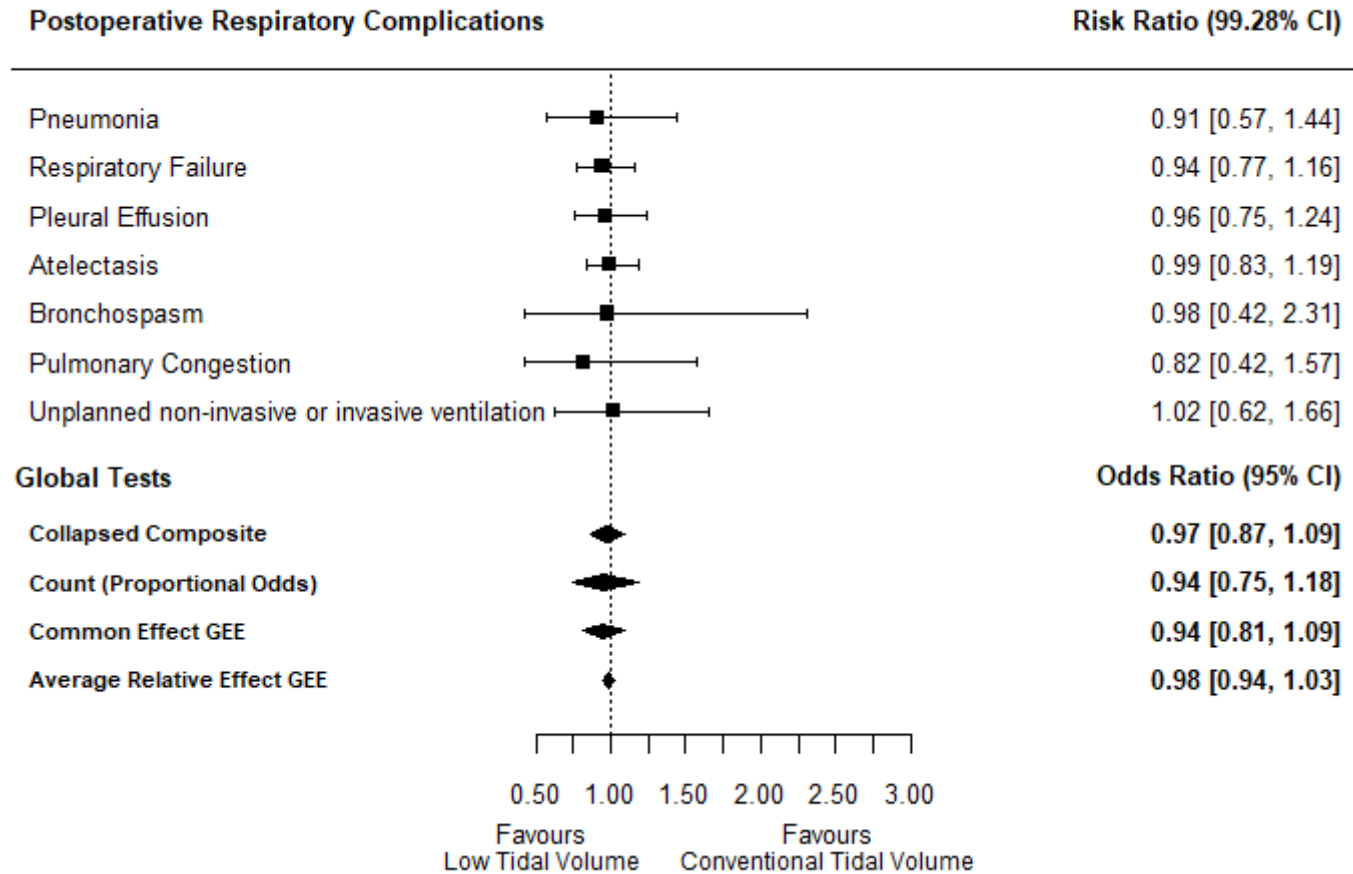

The effect of the intervention in each component was analyzed using a generalized linear model using a Bonferroni correction for multiple comparisons. The 99.28% Bonferroni-corrected confidence intervals is reported ( $1 - 0.05/7 = 0.9928$ ). Pneumothorax was excluded from this analysis due to the absence of events in one group.  
*CI: confidence interval; GEE: generalized estimating equations*

**eFigure 4. Risk Ratio for Postoperative Respiratory Complications in Post Hoc Subgroups**

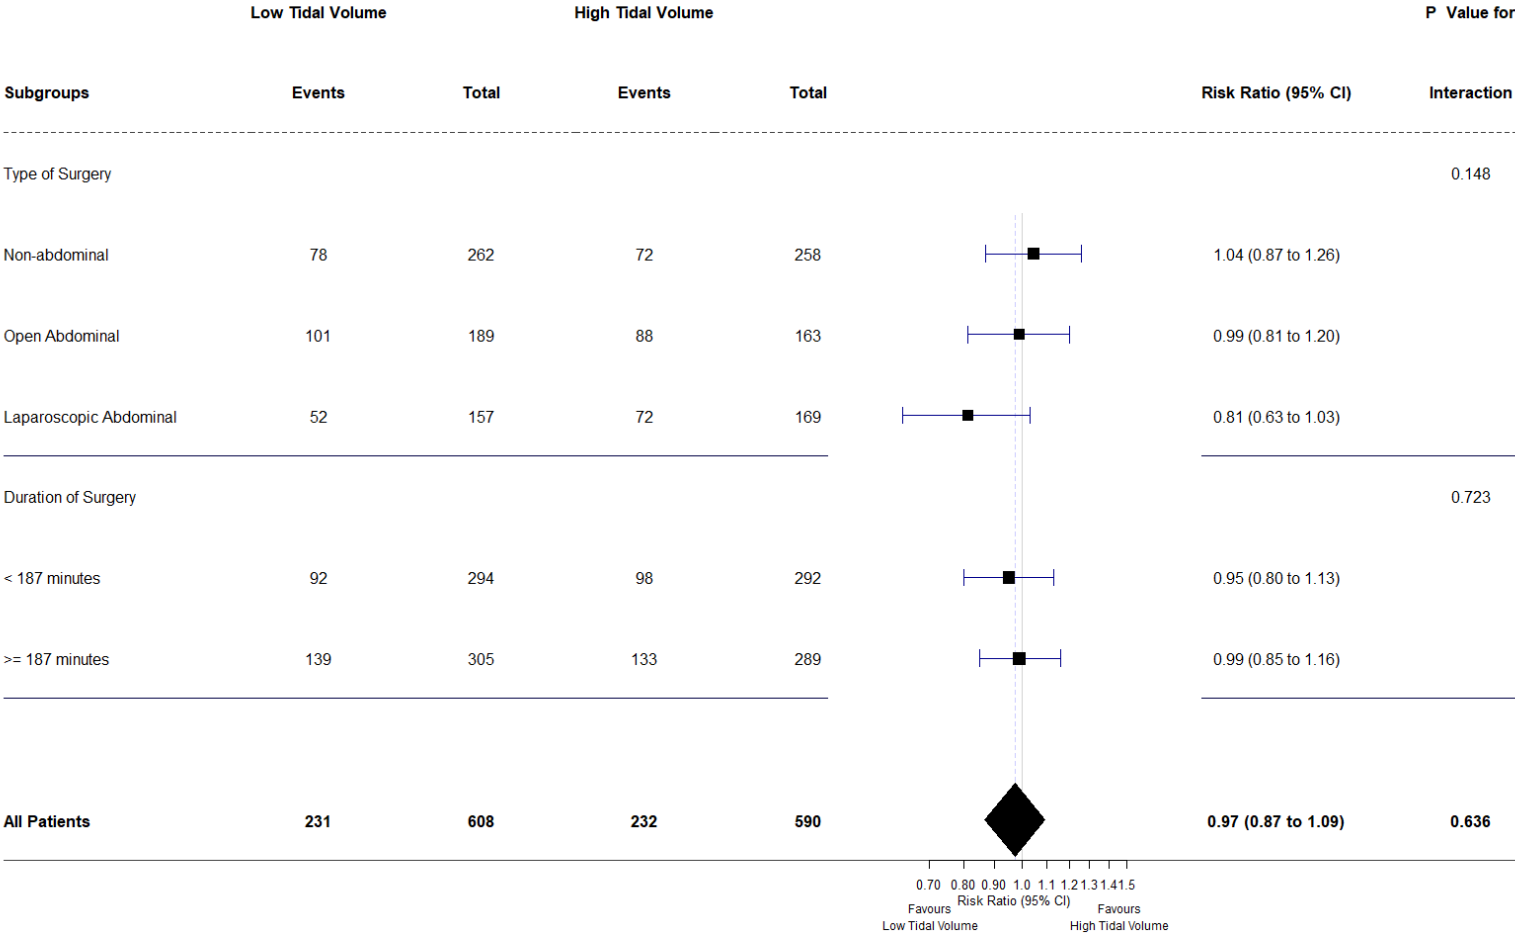

The data marker sizes are proportional to the numbers of patients entering the analysis.  
 CI: confidence interval.

**eFigure 5. Results of the Sensitivity Analysis Allocating 22 Additional Patients in the Conventional Arm With Different Incidences of the Primary Outcomes**

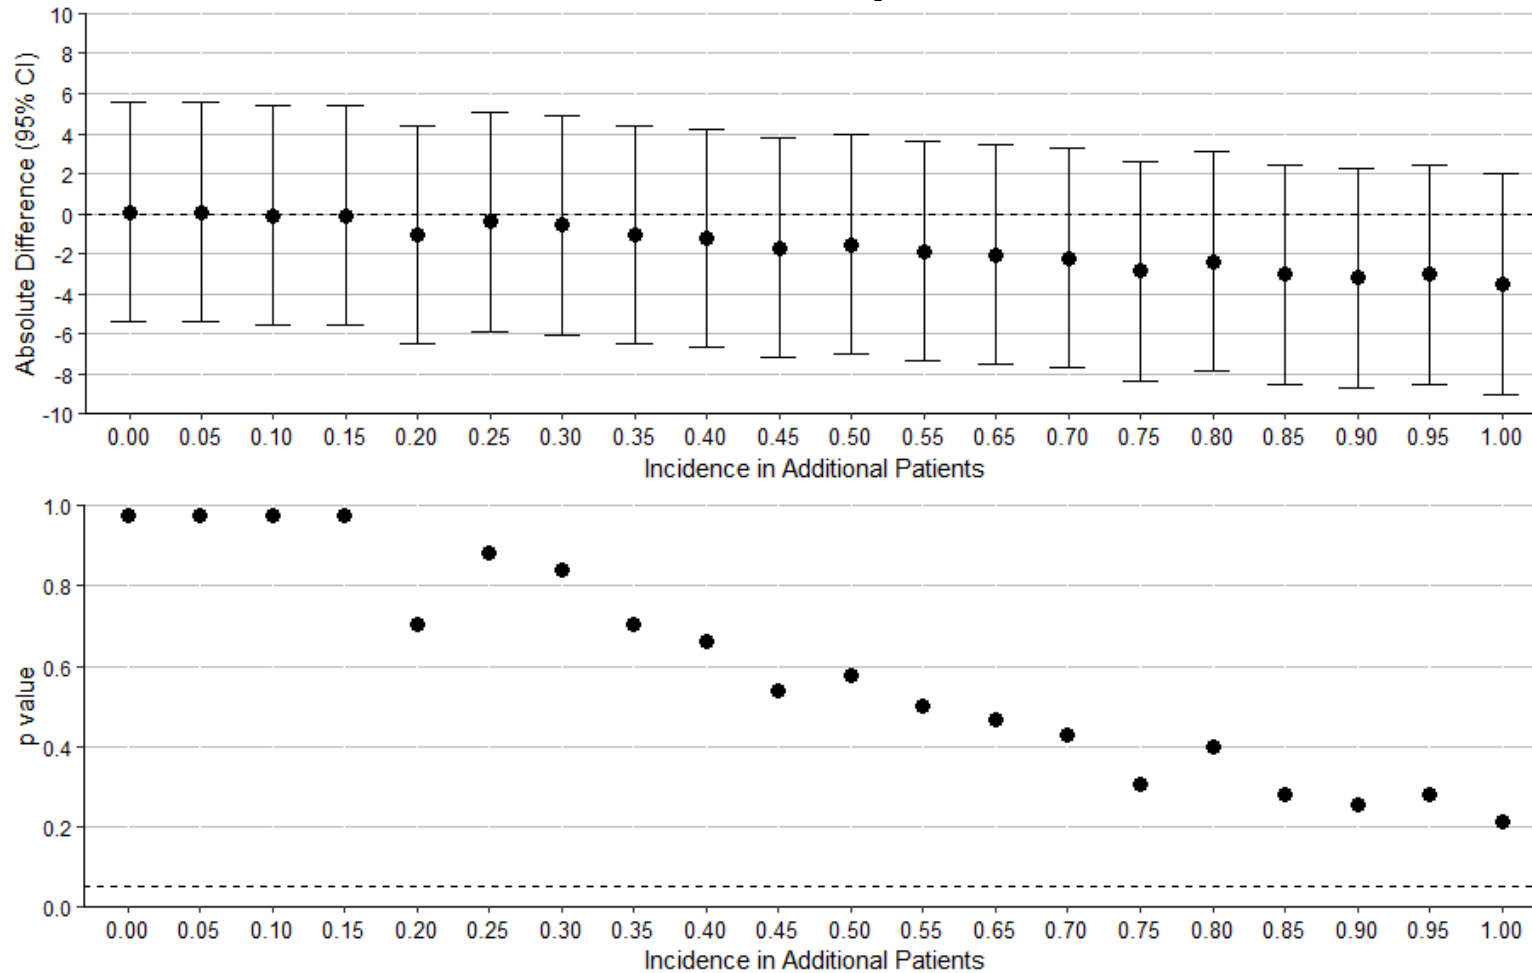

Worst-case scenario (all 22 additional patients developing PPCs): absolute difference, -3.51 (-9.00 to 2.00);  $p = 0.210$ . Best-case scenario (none of the 22 additional patients developing PPCs): absolute difference, 0.08 (-5.35 to 5.52);  $p = 0.975$ . Similar scenario (incidence of PPCs in additional patients similar to patients included in the conventional arm, 39.3%): absolute difference, -1.54 (-7.00 to 3.92);  $p = 0.578$
