# Supplementary material
Source: PubMed Central journal article supplement (PMC7489812)
Supplement: jama-e2012866-s003.pdf [file jama-e2012866-s003.pdf]

Karalapillai D, Weinberg L, Peyton P, et al. Effect of intraoperative low tidal volume vs conventional tidal volume on postoperative pulmonary complications in patients undergoing major surgery: a randomized clinical trial. *JAMA*. Published September 1, 2020. doi:10.1001/jama.2020.12866

## Data Sharing Statement

### Data

**Data available:** Yes

**Data types:** Deidentified participant data, Data dictionary

**How to access data:** According to the rules attached to the submission

**When available:** beginning date: 12-17-2022

### Supporting Documents

**Document types:** Statistical/analytic code

**How to access documents:** By request to the corresponding author and statistician responsible for the analyses

**When available:** beginning date: 12-17-2022

### Additional Information

**Who can access the data:** By request to the corresponding author and statistician responsible for the analyses

**Types of analyses:** By request to the corresponding author and statistician responsible for the analyses

**Mechanisms of data availability:** By request to the corresponding author and statistician responsible for the analyses

**Any additional restrictions:** By request to the corresponding author and statistician responsible for the analyses
